# Supplementary material for: Evolution of host-microbe cell adherence by receptor domain shuffling
Source: eLife. 2022 Jan 25;11:e73330. doi: 10.7554/eLife.73330 (PMC8860441; doi:10.7554/eLife.73330)
Supplement: Figure 2—source data 1. — Table summarizing primate CEACAM sequences extracted for evolutionary analyses and phylogenetic reconstructions. (b) Summary of primate CEACAM identification. Table summarizing BLAST results, genome annotation, and sequence analyses used to identify human CEACAM orthologs in primates. (c) Additional notes on primate CEACAM identification. Table of additional notes on CEACAM sequences used in analyses. (d) PAML NS sites results summary. Table of PAML NS sites tests of selection in primate CEACAMs. (e) Summary of sites identified by evolutionary analyses. Table of sites identified as evolving under positive selection by evolutionary analyses and GARD predicted recombination breakpoints. (f) References for CEACAM1 binding sites. Table of references for sites identified as contributing to CEACAM1 binding with host proteins and bacterial adhesins as well as the specific sites identified. [file elife-73330-fig2-data1.xlsx]

## Sheet: source data 1A
spp = Species
NWM = New World Monkey
OWM = Old World Monkey
Hom = Hominids (Great Apes)
	Not found in genome assembly (either not present or not assembled)
	sequences removed from analyses for technical reasons (see specific notes in supplementary file 8)
	Variably included in CEACAM5 multisequence alignments (see Methods)
Common Name	spp	Group	CEACAM1	CEACAM3	CEACAM4	CEACAM5	CEACAM6	CEACAM7	CEACAM8	CEACAM16	CEACAM18	CEACAM19	CEACAM20	CEACAM21	Total CEACAM seqs
Human	Homo sapiens	Hom	X	X	X	X	X	X	X	X	X	X	X	X	12
Bonobo	Pan paniscus	Hom	X	X	X	X	X	X	X	X	X	X	X		11
Chimpanzee	Pan troglodytes	Hom	X	X	X	X	X	X	X	X	X	X	X		11
Gorilla	Gorilla gorilla	Hom	X	X	X	X	X	X	X	X	X	X	X	X	12
Sumatran orangutan	Pongo abelii	Hom	X	X	X	X	X	X	X	X	X	X	X	X	12
African green monkey	Chlorocebus sabaeus	OWM	X	X		X	X	X	X	X		X	X		9
Baboon	Papio anubis	OWM	X	X	X	X	X	X	X	X		X	X		10
Black-and-white colobus	Colobus angolensis palliatus	OWM	X	X	X	X	X	X	X	X		X	X		10
Black snub-nosed monkey	Rhinopithecus bieti	OWM	X	X	X	X	X		X	X		X	X		9
Golden snub-nosed monkey	Rhinopithecus roxellana	OWM	X	X	X	X	X		X	X		X	X		9
Crab-eating macaque	Macaca fascicularis	OWM	X	X	X	X	X	X	X	X	X	X	X		11
Drill	Mandrillus leucophaeus	OWM	X	X	X	X	X	X	X	X		X	X		10
Pig-tailed macaque	Macaca nemestrina	OWM	X	X	X	X	X	X	X	X	X	X	X		11
Rhesus macaque	Macaca mulatta	OWM	X	X	X	X	X	X	X	X	X	X	X		11
Sooty mangabey	Cercocebus atys	OWM	X	X	X	X	X	X	X	X		X	X		10
Bolivian squirrel monkey	Saimiri boliviensis boliviensis	NWM	X			X	X	X	X	X	X	X	X		9
Common marmoset	Callithrix jacchus	NWM	X			X	X	X	X	X	X	X	X		9
Nancy Ma's night monkey	Aotus nancymaae	NWM	X			X	X	X	X	X	X	X	X		9
Panamanian white-faced capuchin	Cebus imitator	NWM	X			X	X	X	X	X	X	X	X		9
	total spp.		19	15	14	19	19	17	19	19	12	19	19	3	194
	excluded sequences		0	0	0	1	1	0	0	0	1	3	2	0	8
													total sequences		186

## Sheet: source data 1B
spp = Species
Hom = Hominids (Great Apes)
OWM = Old World Monkey
NWM = New World Monkey
q.start/end = starting and ending base of human CEACAM genomic region used as query sequence
	Results indicate that homolog is not found in genome (either not present or not assembled)
	sequences removed from analyses for technical reasons (see specific gene notes)
	Variably included in CEACAM5 multisequence alignments (see Materials and Methods)
				Source		Human BLAST result summary		Orthology evidence
Common Name	spp	Group	Human Ortholog Query	date accessed	Name	GenBank assembly accession:	Query coverage	Ident	region annotation	RefSeq status:	human synteny	Notes
Human	Homo sapiens	Hom	CEACAM1	2019-03-22	GRCh38.p12	GCA_000001405.27	q.start(19:42507306)	q.end(19:42528509)	CEACAM1	REVIEWED	NA
Bonobo	Pan paniscus	Hom	CEACAM1	2019-03-22	panpan1.1	GCA_000258655.2	0.99	0.9755	CEACAM1	MODEL	conserved
Chimpanzee	Pan troglodytes	Hom	CEACAM1	2019-03-22	Clint_PTRv2	GCA_002880755.3	1	0.984	CEACAM1	MODEL	conserved
Gorilla	Gorilla gorilla	Hom	CEACAM1	2019-03-27	gorGor4	GCA_000151905.3	0.84	0.9423	CEACAM1	MODEL	conserved
Sumatran orangutan	Pongo abelii	Hom	CEACAM1	2019-03-27	Susie_PABv2	GCA_002880775.3	0.99	0.9599	CEACAM1	PROVISIONAL	conserved
African green monkey	Chlorocebus sabaeus	OWM	CEACAM1	2019-03-22	Chlorocebus_sabeus 1.1	GCF_000409795.2	0.98	0.9371	CEACAM1	MODEL	conserved
Baboon	Papio anubis	OWM	CEACAM1	2019-03-22	Panu_3.0	GCF_000264685.3	0.98	0.9382	CEACAM1	MODEL	conserved
Black-and-white colobus	Colobus angolensis palliatus	OWM	CEACAM1	2019-03-22	Cang.pa_1.0	GCF_000951035.1	0.95	0.93	CEACAM1	MODEL	conserved
Black snub-nosed monkey	Rhinopithecus bieti	OWM	CEACAM1	2019-03-22	ASM169854v1	GCF_001698545.1	0.94	0.9315	CEACAM1	MODEL	conserved
Crab-eating macaque	Macaca fascicularis	OWM	CEACAM1	2019-03-22	Macaca_fascicularis_5.0	GCF_000364345.1	0.98	0.9305	CEACAM1	MODEL	conserved
Drill	Mandrillus leucophaeus	OWM	CEACAM1	2019-03-22	Mleu.le_1.0	GCF_000951045.1	0.94	0.9287	LOC105541640 - CEACAM1	MODEL	conserved
Golden snub-nosed monkey	Rhinopithecus roxellana	OWM	CEACAM1	2019-03-27	Rrox_v1	GCF_000769185.1	0.98	0.9308	CEACAM1	MODEL	conserved
Pig-tailed macaque	Macaca nemestrina	OWM	CEACAM1	2019-03-27	Mnem_1.0	GCF_000956065.1	0.95	0.9328	CEACAM1	MODEL	conserved
Rhesus macaque	Macaca mulatta	OWM	CEACAM1	2019-03-27	Mmul_8.0.1	GCF_000772875.2	0.98	0.9185	CEACAM1	MODEL	conserved
Rhesus macaque	Macaca mulatta	OWM	CEACAM1	2019-05-26	Mmul_10	GCF_003339765.1	NA	NA	NA	NA	NA	(See Figure 2 - source data 1C CEACAM1) some bps within CDS are different and there is a indel that is now more in line with human and other primate sequences.
Sooty mangabey	Cercocebus atys	OWM	CEACAM1	2019-03-27	Caty_1.0	GCF_000955945.1	0.94	0.9276	CEACAM1	MODEL	conserved
Bolivian squirrel monkey	Saimiri boliviensis boliviensis	NWM	CEACAM1	2019-03-22	SaiBol1.0	GCF_000235385.1	0.87	0.9022	CEACAM1	MODEL	conserved
Common marmoset	Callithrix jacchus	NWM	CEACAM1	2019-03-22	Callithrix jacchus-3.2	GCF_000004665.1	0.79	0.884	LOC100384959 - CEACAM1	MODEL	conserved
Nancy Ma's night monkey	Aotus nancymaae	NWM	CEACAM1	2019-03-27	Anan_2.0	GCA_000952055.2	0.78	0.8873	CEACAM1	MODEL	conserved
Panamanian white-faced capuchin	Cebus imitator	NWM	CEACAM1	2019-03-27	Cebus_imitator-1.0	GCA_001604975.1	0.85	0.8992	LOC108285741 - CEACAM1-like	MODEL	conserved
Human	Homo sapiens	Hom	CEACAM3	2019-04-12	GRCh38.p12	GCA_000001405.27	q.start(19:41796590)	q.end(19:41811553)	CEACAM3	REVIEWED	NA
Bonobo	Pan paniscus	Hom	CEACAM3	2019-04-13	panpan1.1	GCA_000258655.2	1	0.9788	CEACAM3	MODEL	conserved
Chimpanzee	Pan troglodytes	Hom	CEACAM3	2019-04-13	Clint_PTRv2	GCA_002880755.3	1	0.9806	CEACAM3	MODEL	conserved
Gorilla	Gorilla gorilla	Hom	CEACAM3	2019-04-13	gorGor4	GCA_000151905.3	0.99	0.9831	CEACAM3	MODEL	conserved
Sumatran orangutan	Pongo abelii	Hom	CEACAM3	2019-04-13	Susie_PABv2	GCA_002880775.3	0.99	0.9488	CEACAM3	MODEL	conserved
African green monkey	Chlorocebus sabaeus	OWM	CEACAM3	2019-04-12	Chlorocebus_sabeus 1.1	GCF_000409795.2	0.87	0.9094	LOC103234742 - CEACAM6-like	MODEL	conserved
Baboon	Papio anubis	OWM	CEACAM3	2019-04-12	Panu_3.0	GCF_000264685.3	0.85	0.9092	CEACAM3	MODEL	conserved
Black-and-white colobus	Colobus angolensis palliatus	OWM	CEACAM3	2019-04-13	Cang.pa_1.0	GCF_000951035.1	0.8	0.9076	LOC105507867 - CEACAM3	MODEL	conserved	comparing sequence alignments between human, black snub nosed monkey and golden snub nosed monkey it appears CEACAM3 and CEACAM6 are encompassed in this annotation, but it might be complex, annotation may encompass CEACAM3, CEACAM5 and CEACAM6 as different isoforms of the same gene
Black snub-nosed monkey	Rhinopithecus bieti	OWM	CEACAM3	2019-04-13	ASM169854v1	GCF_001698545.1	0.78	0.907	CEACAM3	MODEL	conserved	confirmed that the annotation encompasses both CEACAM3 and CEACAM6, possibly right in between some introns of CEACAM3, but CEACAM5 is not within this region
Golden snub-nosed monkey	Rhinopithecus roxellana	OWM	CEACAM3	2019-04-13	Rrox_v1	GCF_000769185.1	0.78	0.907	LOC104676073 - CEACAM3-like	MODEL	conserved
Drill	Mandrillus leucophaeus	OWM	CEACAM3	2019-04-13	Mleu.le_1.0	GCF_000951045.1	0.81	0.9075	LOC105541944 - CEACAM3-like	MODEL	conserved
Sooty mangabey	Cercocebus atys	OWM	CEACAM3	2019-04-13	Caty_1.0	GCF_000955945.1	0.81	0.908	CEACAM3	MODEL	conserved
Pig-tailed macaque	Macaca nemestrina	OWM	CEACAM3	2019-04-13	Mnem_1.0	GCF_000956065.1	0.88	0.9042	LOC105495284 - CEACAM3-like	MODEL	conserved
Rhesus macaque	Macaca mulatta	OWM	CEACAM3	2019-04-13	Mmul_8.0.1	GCF_000772875.2	0.88	0.9051	CEACAM3	MODEL	conserved
Rhesus macaque	Macaca mulatta	OWM	CEACAM3	2019-05-26	Mmul_10	GCF_003339765.1	NA	NA	NA	NA	NA	(See Figure 2 - source data 1C CEACAM1) identical to rhesus CEACAM3 from Mmul_8.0.1 assembly
Crab-eating macaque	Macaca fascicularis	OWM	CEACAM3	2019-04-13	Macaca_fascicularis_5.0	GCF_000364345.1	0.88	0.9047	CEACAM3	MODEL	conserved
Bolivian squirrel monkey	Saimiri boliviensis boliviensis	NWM	CEACAM3	2019-04-13	SaiBol1.0	GCF_000235385.1	0.28	0.815	CEACAM6	MODEL	position similar to CEACAM3, but more consistent with CEACAM6	blasts with higher query coverage and sequence identity to human CEACAM6, probably not orthologous to CEACAM3
Common marmoset	Callithrix jacchus	NWM	CEACAM3	2019-04-13	Callithrix jacchus-3.2	GCF_000004665.1	0.28	0.8262	LOC103789954 - CEACAM6-like	MODEL	position similar to CEACAM3, but more consistent with CEACAM6	blasts with higher query coverage and sequence identity to human CEACAM6, probably not orthologous to CEACAM3; same locus as picked out for CEACAM6, but with query coverage and %ID of 68% and 87.61% respectively. Most likely CEACAM6
Nancy Ma's night monkey	Aotus nancymaae	NWM	CEACAM3	2019-04-13	Anan_2.0	GCA_000952055.2	0.33	0.8296	LOC110568163 - CEACAM6-like	MODEL	position similar to CEACAM3, but more consistent with CEACAM6	blasts with higher query coverage and sequence identity to human CEACAM6, probably not orthologous to CEACAM3; same locus as picked out for CEACAM6, but with query coverage and %ID of 77% and 88.94% respectively. Most likely CEACAM6
Panamanian white-faced capuchin	Cebus imitator	NWM	CEACAM3	2019-04-13	Cebus_imitator-1.0	GCA_001604975.1	0.27	0.8352	LOC108285747 - CEACAM8-like	MODEL	position is more consistent with CEACAM7	not clear whether this locus is CEACAM6 or CEACAM5 (though probably CEACAM5), but either CEACAM6 or CEACAM5 is more similar than to CEACAM3
Human	Homo sapiens	Hom	CEACAM4	2019-03-29	GRCh38.p12	GCA_000001405.27	q.start(19:41627087)	q.end(19:41616986)	CEACAM4	VALIDATED	NA
Bonobo	Pan paniscus	Hom	CEACAM4	2019-04-04	panpan1.1	GCA_000258655.2	0.99	0.9755	CEACAM4	MODEL	conserved
Chimpanzee	Pan troglodytes	Hom	CEACAM4	2019-04-04	Clint_PTRv2	GCA_002880755.3	1	0.9755	CEACAM4	MODEL	conserved
Gorilla	Gorilla gorilla	Hom	CEACAM4	2019-04-04	gorGor4	GCA_000151905.3	0.99	0.9769	CEACAM4	MODEL	conserved
Sumatran orangutan	Pongo abelii	Hom	CEACAM4	2019-04-04	Susie_PABv2	GCA_002880775.3	0.99	0.9605	CEACAM4	MODEL	conserved
African green monkey	Chlorocebus sabaeus	OWM	CEACAM4	2019-04-04	Chlorocebus_sabeus 1.1	GCF_000409795.2	0.85	0.8196	LOC103235512 - ψCEACAM3-like	MODEL	located in between CEACAM1 and CEACAM8 which is not the expected location of CEACAM4	classified as a likely pseudogene and not in a position where CEACAM4 would be expected so is unlikely to be orthologous to CEACAM4
African green monkey	Chlorocebus sabaeus	OWM	CEACAM4	2019-04-04	Chlorocebus_sabeus 1.1	GCF_000409795.2	0.2	0.8107	LOC103247073 - ψPSG7	MODEL	located on a relatively short contig with out predicted PSG genes	unlikely to be CEACAM4; this sequence also blasts to several other PSG-like proteins
Baboon	Papio anubis	OWM	CEACAM4	2019-04-04	Panu_3.0	GCF_000264685.3	1	0.8999	CEACAM4	MODEL	conserved
Black-and-white colobus	Colobus angolensis palliatus	OWM	CEACAM4	2019-04-04	Cang.pa_1.0	GCF_000951035.1	1	0.9026	CEACAM4	MODEL	conserved
Black snub-nosed monkey	Rhinopithecus bieti	OWM	CEACAM4	2019-04-04	ASM169854v1	GCF_001698545.1	0.99	0.9078	CEACAM4	MODEL	layout of this locus more consistent with CEACAM7	comparing the sequence of this region to the CEACAM4 and CEACAM7 sequence from human and colobus (a much closer relative of black snub nosed monkey and with both CEACAM4 and CEACAM7 well defined) confirmed that this gene is much more similar to CEACAM4 and likely represents a true ortholog
Golden snub-nosed monkey	Rhinopithecus roxellana	OWM	CEACAM4	2019-04-04	Rrox_v1	GCF_000769185.1	0.99	0.9059	CEACAM4	MODEL	layout of this locus more consistent with CEACAM7	comparing the sequence of this region to the CEACAM4 and CEACAM7 sequence from human and colobus (a much closer relative of golden snub nosed monkey and with both CEACAM4 and CEACAM7 well defined) confirmed that this gene is much more similar to CEACAM4 and likely represents a true ortholog
Drill	Mandrillus leucophaeus	OWM	CEACAM4	2019-04-04	Mleu.le_1.0	GCF_000951045.1	0.99	0.8977	LOC105541955 - CEACAM4	MODEL	layout of this locus more consistent with CEACAM7	comparing this region to CEACAM4 and CEACAM7 extracted from rhesus, it looks like both CEACAM4 and CEACAM7 are contained in this annotation, but that maybe an intron moved around in CEACAM4, used the combined CEACAM4 and CEACA<7 region for alignments and trimming with other CEACAM4 and CEACAM7 homologs
Sooty mangabey	Cercocebus atys	OWM	CEACAM4	2019-04-04	Caty_1.0	GCF_000955945.1	1	0.8976	CEACAM4	MODEL	conserved
Pig-tailed macaque	Macaca nemestrina	OWM	CEACAM4	2019-04-04	Mnem_1.0	GCF_000956065.1	1	0.8959	LOC105495287 - CEACAM4	MODEL	conserved
Rhesus macaque	Macaca mulatta	OWM	CEACAM4	2019-04-04	Mmul_8.0.1	GCF_000772875.2	1	0.9012	CEACAM4	MODEL	conserved
Rhesus macaque	Macaca mulatta	OWM	CEACAM4	2019-05-26	Mmul_10	GCF_003339765.1	NA	NA	NA	NA	NA	(See Figure 2 - source data 1C CEACAM1) some of bps within CDS are different between old and new genome assemblies
Crab-eating macaque	Macaca fascicularis	OWM	CEACAM4	2019-04-04	Macaca_fascicularis_5.0	GCF_000364345.1	1	0.9004	LOC102136579 - CEACAM4	MODEL	conserved
Bolivian squirrel monkey	Saimiri boliviensis boliviensis	NWM	CEACAM4	2019-03-29	SaiBol1.0	GCF_000235385.1	0.19	0.7938	CEACAM5	MODEL	in the correct general region but the orientation and neighboring annotations are inconsistent with CEACAM4
Common marmoset	Callithrix jacchus	NWM	CEACAM4	2019-04-03	Callithrix jacchus-3.2	GCF_000004665.1	0.15	0.765	LOC100402710 - PSG8-like	MODEL	contig very short and this is the only gene annotated, so not possible to compare synteny.
Common marmoset	Callithrix jacchus	NWM	CEACAM4	2019-04-03	Callithrix jacchus-3.2	GCF_000004665.1	0.15	0.7597	LOC100388701 - PSG8-like	MODEL	contig so short this is the only gene annotated, so can't compare synteny
Common marmoset	Callithrix jacchus	NWM	CEACAM4	2019-04-03	Callithrix jacchus-3.2	GCF_000004665.1	0.18	0.7768	LOC100409241 - CEACAM8-like	MODEL	position, location and orientation more consistent with CEACAM5
Nancy Ma's night monkey	Aotus nancymaae	NWM	CEACAM4	2019-04-03	Anan_2.0	GCA_000952055.2	0.19	0.8035	CEACAM5	MODEL	position, location and orientation consistent with CEACAM5
Nancy Ma's night monkey	Aotus nancymaae	NWM	CEACAM4	2019-04-03	Anan_2.0	GCA_000952055.2	0.15	0.7618	LOC105705658 - PSG8-like	MODEL	very short contig, only next to another PSG8-like gene and an uncharacterized ncRNA
Panamanian white-faced capuchin	Cebus imitator	NWM	CEACAM4	2019-04-03	Cebus_imitator-1.0	GCA_001604975.1	0.17	0.7818	LOC108285751 - CEACAM8-like	MODEL	position, location and orientation consistent with CEACAM7
Panamanian white-faced capuchin	Cebus imitator	NWM	CEACAM4	2019-04-03	Cebus_imitator-1.0	GCA_001604975.1	0.15	0.7456	LOC108285384 - CEACAM21-like	MODEL	no
Human	Homo sapiens	Hom	CEACAM8	2019-02-11	GRCh38.p12	GCA_000001405.27	q.start(19:42595157)	q.end(19:42580243)	CEACAM8	VALIDATED	NA
Bonobo	Pan paniscus	Hom	CEACAM8	2019-02-11	panpan1.1	GCA_000258655.2	0.99	0.9863	LOC103785009 - CEACAM8	MODEL	maybe; possibly an extra CEACAM gene annotated between what is annotated as CEACAM1 and CEACAM8
Chimpanzee	Pan troglodytes	Hom	CEACAM8	2019-02-11	Clint_PTRv2	GCA_002880755.3	0.99	0.9853	CEACAM8	MODEL	conserved
Gorilla	Gorilla gorilla	Hom	CEACAM8	2019-02-12	gorGor4	GCA_000151905.3	0.99	0.9829	LOC101148900 - CEACAM8	MODEL	maybe; CEACAM1 annotated nearby as expected, but also two other genes annotated as CEACAM-like, possibly PSG's
Sumatran orangutan	Pongo abelii	Hom	CEACAM8	2019-02-13	Susie_PABv2	GCA_002880775.3	0.97	0.9572	LOC103888613 - CEACAM8	MODEL	conserved
African green monkey	Chlorocebus sabaeus	OWM	CEACAM8	2019-02-11	Chlorocebus_sabeus 1.1	GCF_000409795.2	0.95	0.9251	CEACAM8	MODEL	conserved
Baboon	Papio anubis	OWM	CEACAM8	2019-02-11	Panu_3.0	GCF_000264685.3	0.93	0.9206	LOC101024912 - CEACAM8	MODEL	conserved
Black-and-white colobus	Colobus angolensis palliatus	OWM	CEACAM8	2019-02-11	Cang.pa_1.0	GCF_000951035.1	0.92	0.915	CEACAM8	MODEL	conserved
Black snub-nosed monkey	Rhinopithecus bieti	OWM	CEACAM8	2019-02-11	ASM169854v1	GCF_001698545.1	0.87	0.9196	LOC108513888 - CEACAM8	MODEL	conserved
Crab-eating macaque	Macaca fascicularis	OWM	CEACAM8	2019-02-12	Macaca_fascicularis_5.0	GCF_000364345.1	0.95	0.9222	CEACAM8	MODEL	conserved
Drill	Mandrillus leucophaeus	OWM	CEACAM8	2019-02-12	Mleu.le_1.0	GCF_000951045.1	0.95	0.925	LOC105541634 - CEACAM8	MODEL	conserved
Golden snub-nosed monkey	Rhinopithecus roxellana	OWM	CEACAM8	2019-02-12	Rrox_v1	GCF_000769185.1	0.87	0.9207	CEACAM8	MODEL	conserved
Pig-tailed macaque	Macaca nemestrina	OWM	CEACAM8	2019-02-12	Mnem_1.0	GCF_000956065.1	0.95	0.92	CEACAM8	MODEL	conserved
Rhesus macaque	Macaca mulatta	OWM	CEACAM8	2019-02-13	Mmul_8.0.1	GCF_000772875.2	0.95	0.9226	LOC708398 - CEACAM8	MODEL	conserved
Rhesus macaque	Macaca mulatta	OWM	CEACAM8	2019-05-26	Mmul_10	GCF_003339765.1	NA	NA	NA	NA	NA	(See Figure 2 - source data 1C CEACAM1) single bp changes between the new and old genome assemblies, and geneious translations indicates that it is synonymous.
Sooty mangabey	Cercocebus atys	OWM	CEACAM8	2019-02-13	Caty_1.0	GCF_000955945.1	0.95	0.9171	CEACAM8	MODEL	conserved
Bolivian squirrel monkey	Saimiri boliviensis boliviensis	NWM	CEACAM8	2019-02-11	SaiBol1.0	GCF_000235385.1	0.88	0.8799	LOC101030834 - CEACAM8	MODEL	conserved
Common marmoset	Callithrix jacchus	NWM	CEACAM8	2019-02-11	Callithrix jacchus-3.2	GCF_000004665.1	0.87	0.8823	CEACAM8	MODEL	conserved
Nancy Ma's night monkey	Aotus nancymaae	NWM	CEACAM8	2019-02-12	Anan_2.0	GCA_000952055.2	0.93	0.8727	LOC105723464 - CEACAM8-like	MODEL	conserved
Panamanian white-faced capuchin	Cebus imitator	NWM	CEACAM8	2019-02-13	Cebus_imitator-1.0	GCA_001604975.1	0.86	0.8718	LOC108285746 - CEACAM8-like	MODEL	conserved
Human	Homo sapiens	Hom	CEACAM5	2019-02-05	GRCh38.p12	GCA_000001405.27	q.start(19:41708585)	q.end(19:41730433)	CEACAM5	REVIEWED	NA
Bonobo	Pan paniscus	Hom	CEACAM5	2019-02-05	panpan1.1	GCA_000258655.2	0.99	0.979	CEACAM5	MODEL	conserved
Chimpanzee	Pan troglodytes	Hom	CEACAM5	2019-02-05	Clint_PTRv2	GCA_002880755.3	0.99	0.98	CEACAM5	MODEL	conserved
Gorilla	Gorilla gorilla	Hom	CEACAM5	2019-02-05	gorGor4	GCA_000151905.3	1	0.9716	CEACAM5	MODEL	conserved
Sumatran orangutan	Pongo abelii	Hom	CEACAM5	2019-02-05	Susie_PABv2	GCA_002880775.3	1	0.9571	CEACAM5	MODEL	conserved
African green monkey	Chlorocebus sabaeus	OWM	CEACAM5	2019-03-30	Chlorocebus_sabeus 1.1	GCF_000409795.2	0.94	0.8808	LOC103234740 - CEACAM5-like	MODEL	conserved
Baboon	Papio anubis	OWM	CEACAM5	2019-02-05	Panu_3.0	GCF_000264685.3	0.94	0.8815	CEACAM5	MODEL	conserved
Black-and-white colobus	Colobus angolensis palliatus	OWM	CEACAM5	2019-02-05	Cang.pa_1.0	GCF_000951035.1	0.94	0.9235	LOC105507867 - CEACAM3	MODEL	conserved	while it is annotated as CEACAM3 annotation is likely covering multiple CEACAM genes; extracted fasta sequence for the region with the main hit which a clustalo alignment (2/5/2019) with the human CEACAM5 genomic sequence found to cover all of the human CEACAM5 sequence with ~90% identity.
Black snub-nosed monkey	Rhinopithecus bieti	OWM	CEACAM5	2019-03-30	ASM169854v1	GCF_001698545.1	0.94	0.9176	LOC108522838 - CEACAM5-like	MODEL	conserved	contig it is on is very short and only includes three annotated gene features including CEACAM5, CEACAM4 and what is identified as an uncharacterized ncRNA.
Crab-eating macaque	Macaca fascicularis	OWM	CEACAM5	2019-02-05	Macaca_fascicularis_5.0	GCF_000364345.1	0.94	0.8927	CEACAM5	MODEL	conserved
Drill	Mandrillus leucophaeus	OWM	CEACAM5	2019-02-05	Mleu.le_1.0	GCF_000951045.1	0.94	0.9249	CEACAM5	MODEL	conserved
Golden snub-nosed monkey	Rhinopithecus roxellana	OWM	CEACAM5	2019-03-30	Rrox_v1	GCF_000769185.1	0.95	0.8917	LOC104676075 - CEACAM5-like	MODEL	conserved
Pig-tailed macaque	Macaca nemestrina	OWM	CEACAM5	2019-02-05	Mnem_1.0	GCF_000956065.1	0.94	0.906	LOC105495621 - CEACAM8-like	MODEL	conserved	annotation is CEACAM8-like, but the CEACAMs are all very similar and the genomic context is CEACAM5 not CEACAM8. Also, very poor sequence with lots of N's and ultimately this sequence had to be removed from analyses (See Figure 2 - source data 1C: CEACAM5 note A)
Rhesus macaque	Macaca mulatta	OWM	CEACAM5	2019-02-05	Mmul_8.0.1	GCF_000772875.2	0.94	0.9	CEACAM5	PROVISIONAL	conserved
Rhesus macaque	Macaca mulatta	OWM	CEACAM5	2019-05-26	Mmul_10	GCF_003339765.1	NA	NA	NA	NA	NA	(See Figure 2 - source data 1C CEACAM1) some of bps within CDS are different between the old and new genome assemblies
Sooty mangabey	Cercocebus atys	OWM	CEACAM5	2019-02-05	Caty_1.0	GCF_000955945.1	0.94	0.8899	LOC105598029 - CEACAM1-like	MODEL	conserved	annotation is CEACAM1-like, but the CEACAM genes are all very similar and the genomic context CEACAM5 not CEACAM1
Bolivian squirrel monkey	Saimiri boliviensis boliviensis	NWM	CEACAM5	2019-02-05	SaiBol1.0	GCF_000235385.1	0.83	0.8465	CEACAM5	MODEL	conserved
Common marmoset	Callithrix jacchus	NWM	CEACAM5	2019-02-05	Callithrix jacchus-3.2	GCF_000004665.1	0.79	0.84	LOC100409241 - CEACAM8-like	MODEL	conserved	BLAST hit to a gene annotated as CEACAM7, however there are two other CEACAM-like genes annotated in the region (this is expected as NWM are not known to have CEACAMs 3 and 4) that had blast hits to human CEACAM5 and the middle gene between CEACAM7 and the other CEACAM was in the posistion expected for CEACAM5. Extracting the three regions with blast hits and aligning them with clustalo confirmed…
Nancy Ma's night monkey	Aotus nancymaae	NWM	CEACAM5	2019-02-05	Anan_2.0	GCA_000952055.2	0.83	0.866	CEACAM5	MODEL	conserved
Panamanian white-faced capuchin	Cebus imitator	NWM	CEACAM5	2019-03-30	Cebus_imitator-1.0	GCA_001604975.1	0.76	0.8731	LOC108285747 - CEACAM8-like	MODEL
Human	Homo sapiens	Hom	CEACAM18	2019-04-22	GRCh38.p12	GCA_000001405.27	q.start(19:51478543)	q.end(19:51491261)	CEACAM18	VALIDATED	NA
Bonobo	Pan paniscus	Hom	CEACAM18	2019-04-26	panpan1.1	GCA_000258655.2	0.99	0.9767	CEACAM18	MODEL	conserved	Blast hit extends a bit past the end of the bonobo CEACAM18 annotation, so downloaded both the annotation as well as the annotation plus the bit that extends past it.
Chimpanzee	Pan troglodytes	Hom	CEACAM18	2019-04-26	Clint_PTRv2	GCA_002880755.3	1	0.9746	CEACAM18	MODEL	conserved	Blast hit extends a bit past the end of the chimp CEACAM18 annotation, so downloaded both the annotation as well as the annotation plus the bit that extends past it.
Gorilla	Gorilla gorilla	Hom	CEACAM18	2019-04-26	gorGor4	GCA_000151905.3	0.99	0.971	CEACAM18	MODEL	conserved	Blast hit extends a bit past the end of the gorilla CEACAM18 annotation, so downloaded both the annotation as well as the annotation plus the bit that extends past it.
Sumatran orangutan	Pongo abelii	Hom	CEACAM18	2019-04-26	Susie_PABv2	GCA_002880775.3	0.99	0.9483	CEACAM18	MODEL	conserved	Blast hit extends a bit past the end of the orangutan CEACAM18 annotation, so downloaded both the annotation as well as the annotation plus the bit that extends past it.
African green monkey	Chlorocebus sabaeus	OWM	CEACAM18	2019-04-26	Chlorocebus_sabeus 1.1	GCF_000409795.2	0.03	0.8585	none	none	conserved	blast hits to the expected chromosomal location, but region too small.
Baboon	Papio anubis	OWM	CEACAM18	2019-04-26	Panu_3.0	GCF_000264685.3	0.13	0.8422	none	none	no	specific location incorrect, also low coverage and sequence identity make this unlikely to be a functioning CEACAM gene.
Black-and-white colobus	Colobus angolensis palliatus	OWM	CEACAM18	2019-04-26	Cang.pa_1.0	GCF_000951035.1	0.61	0.9083	none	none	conserved	sequence does not align with other CEACAM19 sequences
Black snub-nosed monkey	Rhinopithecus bieti	OWM	CEACAM18	2019-04-26	ASM169854v1	GCF_001698545.1	0.66	0.9138	none	none	conserved	does not align with other CEACAM19 sequences
Crab-eating macaque	Macaca fascicularis	OWM	CEACAM18	2019-04-26	Macaca_fascicularis_5.0	GCF_000364345.1	0.98	0.924	CEACAM18	MODEL	conserved
Drill	Mandrillus leucophaeus	OWM	CEACAM18	2019-04-26	Mleu.le_1.0	GCF_000951045.1	0.13	0.836	none	none	no	specific location incorrect, also low coverage and sequence identity make this unlikely to be a functioning CEACAM gene.
Golden snub-nosed monkey	Rhinopithecus roxellana	OWM	CEACAM18	2019-04-26	Rrox_v1	GCF_000769185.1	0.66	0.9093	none	none	conserved	does not align with other CEACAM19 sequences
Pig-tailed macaque	Macaca nemestrina	OWM	CEACAM18	2019-04-26	Mnem_1.0	GCF_000956065.1	0.99	0.9152	CEACAM18	MODEL	conserved
Rhesus macaque	Macaca mulatta	OWM	CEACAM18	2019-04-26	Mmul_8.0.1	GCF_000772875.2	0.94	0.9285	CEACAM18	MODEL	conserved	almost complete coverage of the query sequence except for one gap which is covered by an unplaced contig included below. Blast hit also extends a bit beyond the annotation, so in addition to downloading the annotation I also downloaded an extended sequence.
Rhesus macaque	Macaca mulatta	OWM	CEACAM18	2019-04-26	Mmul_8.0.1	GCF_000772875.2	0.05	0.9051	none	none	none	very small contig which fits into the missing gap in the above sequence.
Rhesus macaque	Macaca mulatta	OWM	CEACAM18	2019-05-26	Mmul_10	GCF_003339765.1	NA	NA	NA	NA	NA	(See Figure 2 - source data 1C CEACAM1) some of bps within CDS are different between the old and new genome assemblies, also the new genome annotation is contained on a single chromosome level assembly and better matches the annotation prediction for human CEACAM18
Sooty mangabey	Cercocebus atys	OWM	CEACAM18	2019-04-26	Caty_1.0	GCF_000955945.1	0.13	0.8408	none	none	no	specific location incorrect, also low coverage and sequence identity make this unlikely to be a functioning CEACAM gene.
Bolivian squirrel monkey	Saimiri boliviensis boliviensis	NWM	CEACAM18	2019-04-26	SaiBol1.0	GCF_000235385.1	0.63	0.85	CEACAM18	MODEL	yes/no	similar to the region in humans, but structure somewhat different. Only CEACAM gene in the region, has a relatively good blast hit (though only hits to part of the annotation), most likely orthologous to human CEACAM18; Update 3/30/2021: poor quality sequence in the 5' end of sequence, ultimately for this reason excluded from sequence analyses.
Common marmoset	Callithrix jacchus	NWM	CEACAM18	2019-04-26	Callithrix jacchus-3.2	GCF_000004665.1	0.75	0.8517	CEACAM18	MODEL	yes/no	similar to the region in humans, but structure somewhat different. Only CEACAM gene in the region, has a relatively good blast hit, unlike squirrel monkey the annotation is mostly covered by the blast hit.
Nancy Ma's night monkey	Aotus nancymaae	NWM	CEACAM18	2019-04-26	Anan_2.0	GCA_000952055.2	0.75	0.862	CEACAM18	MODEL	yes/no	similar to the region in humans, but structure somewhat different. Only CEACAM gene in the region, has a relatively good blast hit, unlike squirrel monkey the annotation is mostly covered by the blast hit.
Panamanian white-faced capuchin	Cebus imitator	NWM	CEACAM18	2019-04-26	Cebus_imitator-1.0	GCA_001604975.1	0.77	0.8578	CEACAM18	MODEL	yes/no	similar to the region in humans, but structure somewhat different. Only CEACAM gene in the region, has a relatively good blast hit, unlike squirrel monkey the annotation is mostly covered by the blast hit.
Bonobo	Pan paniscus	Hom	CEACAM21	2019-04-22	panpan1.1	GCA_000258655.2	0.37	0.9788	none (Chr 19:47005329..47027082)	none	conserved	no annotations in the region, but it is in the correct location expected for CEACAM21 and some regions have high sequence identity to human CEACAM21 - extracted this region for comparison with human CEACAM21. ; Update 3/30/2021: ultimately determined no intact CEACAM21 gene present
Chimpanzee	Pan troglodytes	Hom	CEACAM21	2019-04-23	Clint_PTRv2	GCA_002880755.3	0.37	0.9782	none (Chr 19:39592942..39614694)	none	conserved	no annotations in the region, but it is in the correct location expected for CEACAM21 and the same region as was hit for Bonobo. In addition some regions have high sequence identity to human CEACAM21 - extracted this region for comparison with human CEACAM21. ; Update 3/30/2021: ultimately determined no intact CEACAM21 gene present
Gorilla	Gorilla gorilla	Hom	CEACAM21	2019-04-23	gorGor4	GCA_000151905.3	0.43	0.9751	CEACAM21	MODEL	yes
Human	Homo sapiens	Hom	CEACAM21	2019-04-13	GRCh38.p12	GCA_000001405.27	q.start(19:41549236)	q.end(19:41586844)	CEACAM21	VALIDATED	NA
Sumatran orangutan	Pongo abelii	Hom	CEACAM21	2019-04-23	Susie_PABv2	GCA_002880775.3	0.98	0.9479	CEACAM21	MODEL	yes	hit extends beyond the gene annotation so downloaded both the annotation as well as the extended gene region (Chr 19:39649998..39736298)
Bolivian squirrel monkey	Saimiri boliviensis boliviensis	NWM	CEACAM21	2019-04-22	SaiBol1.0	GCF_000235385.1	0.07	0.7724	LOC101030834 CEACAM8	MODEL	no
Common marmoset	Callithrix jacchus	NWM	CEACAM21	2019-04-23	Callithrix jacchus-3.2	GCF_000004665.1	0.05	0.8256	CCDC57	MODEL	no
Common marmoset	Callithrix jacchus	NWM	CEACAM21	2019-04-23	Callithrix jacchus-3.2	GCF_000004665.1	0.12	0.7656	CEACAM8	MODEL	no
Nancy Ma's night monkey	Aotus nancymaae	NWM	CEACAM21	2019-04-23	Anan_2.0	GCA_000952055.2	0.03	0.8436	ZNF490	MODEL	no
Nancy Ma's night monkey	Aotus nancymaae	NWM	CEACAM21	2019-04-23	Anan_2.0	GCA_000952055.2	0.08	0.7645	LOC105723468 - CEACAM7	MODEL	yes/no
Panamanian white-faced capuchin	Cebus imitator	NWM	CEACAM21	2019-04-23	Cebus_imitator-1.0	GCA_001604975.1	0.08	0.7699	LOC108285746 - CEACAM8-like	MODEL	no
Panamanian white-faced capuchin	Cebus imitator	NWM	CEACAM21	2019-04-23	Cebus_imitator-1.0	GCA_001604975.1	0.03	0.8123	LOC108282074 - ZFP490	MODEL	no
African green monkey	Chlorocebus sabaeus	OWM	CEACAM21	2019-04-14	Chlorocebus_sabeus 1.1	GCF_000409795.2	0.04	0.8592	none	none	no annotations
African green monkey	Chlorocebus sabaeus	OWM	CEACAM21	2019-04-14	Chlorocebus_sabeus 1.1	GCF_000409795.2	0.17	0.7838	none	none	no annotations
Baboon	Papio anubis	OWM	CEACAM21	2019-04-14	Panu_3.0	GCF_000264685.3	0.24	0.7847	CEACAM5	MODEL	no
Baboon	Papio anubis	OWM	CEACAM21	2019-04-14	Panu_3.0	GCF_000264685.3	0.06	0.861	none	none	no; on chromosome 12
Black-and-white colobus	Colobus angolensis palliatus	OWM	CEACAM21	2019-04-14	Cang.pa_1.0	GCF_000951035.1	0.04	0.8624	none	none	no
Black-and-white colobus	Colobus angolensis palliatus	OWM	CEACAM21	2019-04-14	Cang.pa_1.0	GCF_000951035.1	0.2	0.7878	LOC105507867 - CEACAM3	MODEL	no
Black snub-nosed monkey	Rhinopithecus bieti	OWM	CEACAM21	2019-04-22	ASM169854v1	GCF_001698545.1	0.08	0.7855	LOC108522838 - CEACAM5-like	MODEL	no
Black snub-nosed monkey	Rhinopithecus bieti	OWM	CEACAM21	2019-04-22	ASM169854v1	GCF_001698545.1	0.13	0.7812	LOC108513876 - ψCEACAM3-like	MODEL	no
Crab-eating macaque	Macaca fascicularis	OWM	CEACAM21	2019-04-23	Macaca_fascicularis_5.0	GCF_000364345.1	0.25	0.7846	CEACAM5	MODEL	no
Crab-eating macaque	Macaca fascicularis	OWM	CEACAM21	2019-04-23	Macaca_fascicularis_5.0	GCF_000364345.1	0.07	0.8398	none	none	no
Drill	Mandrillus leucophaeus	OWM	CEACAM21	2019-04-23	Mleu.le_1.0	GCF_000951045.1	0.04	0.8643	none	none	no
Drill	Mandrillus leucophaeus	OWM	CEACAM21	2019-04-23	Mleu.le_1.0	GCF_000951045.1	0.22	0.7842	CEACAM5	MODEL	no
Golden snub-nosed monkey	Rhinopithecus roxellana	OWM	CEACAM21	2019-04-23	Rrox_v1	GCF_000769185.1	0.04	0.8591	none	none	no
Golden snub-nosed monkey	Rhinopithecus roxellana	OWM	CEACAM21	2019-04-23	Rrox_v1	GCF_000769185.1	0.12	0.7836	LOC104676075 - CEACAM5-like	MODEL	no
Golden snub-nosed monkey	Rhinopithecus roxellana	OWM	CEACAM21	2019-04-23	Rrox_v1	GCF_000769185.1	0.13	0.7803	LOC104658881 - ψCEACAM3-like	MODEL	no
Pig-tailed macaque	Macaca nemestrina	OWM	CEACAM21	2019-04-23	Mnem_1.0	GCF_000956065.1	0.22	0.7849	LOC105495621 - CEACAM8-like	MODEL	no
Pig-tailed macaque	Macaca nemestrina	OWM	CEACAM21	2019-04-23	Mnem_1.0	GCF_000956065.1	0.07	0.8406	none	none	no
Rhesus macaque	Macaca mulatta	OWM	CEACAM21	2019-04-23	Mmul_8.0.1	GCF_000772875.2	0.23	0.7843	CEACAM5	PROVISIONAL	no
Rhesus macaque	Macaca mulatta	OWM	CEACAM21	2019-04-23	Mmul_8.0.1	GCF_000772875.2	0.07	0.841	none	none	no
Sooty mangabey	Cercocebus atys	OWM	CEACAM21	2019-04-23	Caty_1.0	GCF_000955945.1	0.07	0.8643	none	none	no
Sooty mangabey	Cercocebus atys	OWM	CEACAM21	2019-04-23	Caty_1.0	GCF_000955945.1	0.22	0.7859	LOC105598029 - CEACAM1-like	MODEL	no
Human	Homo sapiens	Hom	CEACAM6	2019-03-27	GRCh38.p12	GCA_000001405.27	q.start(19:41755520)	q.end(19:41772211)	CEACAM6	REVIEWED	NA
Bonobo	Pan paniscus	Hom	CEACAM6	2019-03-28	panpan1.1	GCA_000258655.2	1	0.9811	CEACAM6	MODEL	conserved
Chimpanzee	Pan troglodytes	Hom	CEACAM6	2019-03-29	Clint_PTRv2	GCA_002880755.3	1	0.9846	CEACAM6	MODEL	conserved
Gorilla	Gorilla gorilla	Hom	CEACAM6	2019-03-29	gorGor4	GCA_000151905.3	1	0.9811	LOC109024100 - CEACAM6	MODEL	conserved
Sumatran orangutan	Pongo abelii	Hom	CEACAM6	2019-03-29	Susie_PABv2	GCA_002880775.3	0.99	0.9651	CEACAM6	MODEL	conserved
African green monkey	Chlorocebus sabaeus	OWM	CEACAM6	2019-07-19	Chlorocebus_sabeus 1.1	GCF_000409795.2	0.95	0.9256	LOC103234741 - CEACAM6	MODEL	conserved
Baboon	Papio anubis	OWM	CEACAM6	2019-03-28	Panu_3.0	GCF_000264685.3	0.95	0.9247	CEACAM6	MODEL	conserved
Black-and-white colobus	Colobus angolensis palliatus	OWM	CEACAM6	2019-03-28	Cang.pa_1.0	GCF_000951035.1	0.95	0.9194	LOC105507867 - CEACAM6	MODEL	conserved	annotation likely encompasses CEACAM5, CEACAM6 and CEACAM3.
Black snub-nosed monkey	Rhinopithecus bieti	OWM	CEACAM6	2019-03-28	ASM169854v1	GCF_001698545.1	0.92	0.9197	LOC108526886 - CEACAM6-like	MODEL	conserved	The black snub-nosed monkey CEACAM6 sequence is more different than expected from other CEACAM6 sequences, so to confirm that the sequence is most likely homologous to the other primate CEACAM6 sequences we did a blast search of the black snub-nosed monkey genome with the CEACAM6 sequence of golden snub-nosed monkey, which is much more inline with the expected sequence for CEACAM6 and being close…
Golden snub-nosed monkey	Rhinopithecus roxellana	OWM	CEACAM6	2019-03-29	Rrox_v1	GCF_000769185.1	0.93	0.9303	CEACAM6	MODEL	conserved
Drill	Mandrillus leucophaeus	OWM	CEACAM6	2019-03-28	Mleu.le_1.0	GCF_000951045.1	0.95	0.9311	no annotation	NA	very likely	This region has high similarity to other CEACAM6 regions, but is not annotated. It is between genes annotated as CEACAM5 and CEACAM3-like as expected for CEACAM6, however the total number of genes annotated as CEACAMs is less than expected and so it is difficult based on this information to be sure about the identity and proximity of the other CEACAMs relative to CEACAM6 in this region. Based on …
Crab-eating macaque	Macaca fascicularis	OWM	CEACAM6	2019-03-28	Macaca_fascicularis_5.0	GCF_000364345.1	0.95	0.9297	CEACAM6	MODEL	conserved
Pig-tailed macaque	Macaca nemestrina	OWM	CEACAM6	2019-03-29	Mnem_1.0	GCF_000956065.1	0.95	0.9308	LOC105495285 - CEACAM6	MODEL	conserved
Rhesus macaque	Macaca mulatta	OWM	CEACAM6	2019-03-29	Mmul_8.0.1	GCF_000772875.2	0.95	0.9299	CEACAM6	MODEL	conserved
Rhesus macaque	Macaca mulatta	OWM	CEACAM6	2019-05-26	Mmul_10	GCF_003339765.1	NA	NA	NA	NA	NA	(See Figure 2 - source data 1C CEACAM1) some of bps within CDS are different between the old and new genome assemblies
Sooty mangabey	Cercocebus atys	OWM	CEACAM6	2019-03-29	Caty_1.0	GCF_000955945.1	0.95	0.9307	CEACAM6	MODEL	conserved
Bolivian squirrel monkey	Saimiri boliviensis boliviensis	NWM	CEACAM6	2019-03-28	SaiBol1.0	GCF_000235385.1	0.7	0.8697	CEACAM6	MODEL	conserved
Common marmoset	Callithrix jacchus	NWM	CEACAM6	2019-03-28	Callithrix jacchus-3.2	GCF_000004665.1	0.68	0.8761	LOC103789954 - CEACAM6-like	MODEL	conserved
Nancy Ma's night monkey	Aotus nancymaae	NWM	CEACAM6	2019-03-29	Anan_2.0	GCA_000952055.2	0.77	0.8894	LOC110568163 - CEACAM6-like	MODEL	conserved
Panamanian white-faced capuchin	Cebus imitator	NWM	CEACAM6	2019-05-01	Cebus_imitator-1.0	GCA_001604975.1	0.78	0.9358	LOC108285749 - CEACAM6-like	MODEL	conserved	To identify this region did a blast search using squirrel monkey CEACAM6; this locus is not in the 5 hits to the capuchin genome when using human CEACAM6 as the query sequence.
Human	Homo sapiens	Hom	CEACAM7	2019-03-29	GRCh38.p12	GCA_000001405.27	q.start(19:41688277)	q.end(19:41673307)	CEACAM7	REVIEWED	NA
Bonobo	Pan paniscus	Hom	CEACAM7	2019-03-29	panpan1.1	GCA_000258655.2	1	0.9879	CEACAM7	MODEL	conserved
Chimpanzee	Pan troglodytes	Hom	CEACAM7	2019-03-29	Clint_PTRv2	GCA_002880755.3	1	0.9893	CEACAM7	MODEL	conserved
Gorilla	Gorilla gorilla	Hom	CEACAM7	2019-03-29	gorGor4	GCA_000151905.3	1	0.9786	CEACAM7	MODEL	conserved
Sumatran orangutan	Pongo abelii	Hom	CEACAM7	2019-03-29	Susie_PABv2	GCA_002880775.3	1	0.9531	CEACAM7	MODEL	conserved
African green monkey	Chlorocebus sabaeus	OWM	CEACAM7	2019-03-29	Chlorocebus_sabeus 1.1	GCF_000409795.2	0.99	0.9168	CEACAM7	MODEL	conserved
Baboon	Papio anubis	OWM	CEACAM7	2019-03-29	Panu_3.0	GCF_000264685.3	1	0.9189	CEACAM7	MODEL	conserved
Black-and-white colobus	Colobus angolensis palliatus	OWM	CEACAM7	2019-03-29	Cang.pa_1.0	GCF_000951035.1	1	0.9156	CEACAM7	MODEL	conserved
Black snub-nosed monkey	Rhinopithecus bieti	OWM	CEACAM7	2019-03-29	ASM169854v1	GCF_001698545.1	0.49	0.7914	LOC108522838 - CEACAM5-like	MODEL	no	hits with much higher coverage and ID to human CEACAM5, almost certainly not CEACAM7, probably CEACAM5; also adjacent to a gene annotated as CEACAM4 as expected for CEACAM7 however orientation is more consistent with CEACAM5, but contig is very short and there are no other annotations to confirm that the gene structure of the region surrounding this gene matches that of CEACAM7 in humans.
Black snub-nosed monkey	Rhinopithecus bieti	OWM	CEACAM7	2019-03-29	ASM169854v1	GCF_001698545.1	0.54	0.778	LOC108513888 - CEACAM8	MODEL	no	annotation hits with much higher coverage and ID to human CEACAM8, almost certainly not CEACAM7 also matches CEACAM8 location
Golden snub-nosed monkey	Rhinopithecus roxellana	OWM	CEACAM7	2019-03-29	Rrox_v1	GCF_000769185.1	0.65	0.7919	LOC104676075 - CEACAM5-like	MODEL	no	hits with much higher coverage and ID to human CEACAM5, almost certainly not CEACAM7, also orientation of gene is more consistent with CEACAM5, but no other CEACAM consistent with CEACAM7 is annotated in this region
Drill	Mandrillus leucophaeus	OWM	CEACAM7	2019-03-29	Mleu.le_1.0	GCF_000951045.1	0.99	0.9169	LOC105541955 - CEACAM4	MODEL	conserved	annotated as CEACAM4, but positioning more consistent with CEACAM7; Update 3/30/2021: determined that both CEACAM4 and CEACAM7 are contained in this annotation
Sooty mangabey	Cercocebus atys	OWM	CEACAM7	2019-03-29	Caty_1.0	GCF_000955945.1	1	0.9191	CEACAM7	MODEL	conserved
Pig-tailed macaque	Macaca nemestrina	OWM	CEACAM7	2019-03-29	Mnem_1.0	GCF_000956065.1	1	0.9204	LOC105495286 - CEACAM7-like	MODEL	conserved
Rhesus macaque	Macaca mulatta	OWM	CEACAM7	2019-03-29	Mmul_8.0.1	GCF_000772875.2	1	0.9201	CEACAM7	MODEL	conserved
Rhesus macaque	Macaca mulatta	OWM	CEACAM7	2019-05-26	Mmul_10	GCF_003339765.1	NA	NA	NA	NA	NA	(See Figure 2 - source data 1C CEACAM1) some of bps within CDS are different between the old and new genome assemblies
Crab-eating macaque	Macaca fascicularis	OWM	CEACAM7	2019-03-29	Macaca_fascicularis_5.0	GCF_000364345.1	1	0.9206	CEACAM7	MODEL	conserved
Bolivian squirrel monkey	Saimiri boliviensis boliviensis	NWM	CEACAM7	2019-03-29	SaiBol1.0	GCF_000235385.1	0.68	0.8578	CEACAM7	MODEL	conserved
Common marmoset	Callithrix jacchus	NWM	CEACAM7	2019-03-29	Callithrix jacchus-3.2	GCF_000004665.1	0.69	0.8482	CEACAM7	MODEL	conserved
Nancy Ma's night monkey	Aotus nancymaae	NWM	CEACAM7	2019-03-29	Anan_2.0	GCA_000952055.2	0.67	0.8853	LOC105723468 - CEACAM7	MODEL	conserved
Panamanian white-faced capuchin	Cebus imitator	NWM	CEACAM7	2019-03-29	Cebus_imitator-1.0	GCA_001604975.1	0.67	0.8774	LOC108285751 - CEACAM8-like	MODEL	conserved
Human	Homo sapiens	Hom	CEACAM16	2019-04-22	GRCh38.p12	GCA_000001405.27	q.start(19:44699151)	q.end(19:44710714)	CEACAM16	REVIEWED	NA
Bonobo	Pan paniscus	Hom	CEACAM16	2019-04-23	panpan1.1	GCA_000258655.2	0.99	0.979	CEACAM16	MODEL	conserved
Chimpanzee	Pan troglodytes	Hom	CEACAM16	2019-04-23	Clint_PTRv2	GCA_002880755.3	1	0.9775	CEACAM16	MODEL	conserved
Gorilla	Gorilla gorilla	Hom	CEACAM16	2019-04-23	gorGor4	GCA_000151905.3	1	0.9768	CEACAM16	MODEL	conserved
Sumatran orangutan	Pongo abelii	Hom	CEACAM16	2019-04-23	Susie_PABv2	GCA_002880775.3	1	0.9557	CEACAM16	MODEL	conserved
African green monkey	Chlorocebus sabaeus	OWM	CEACAM16	2019-04-26	Chlorocebus_sabeus 1.1	GCF_000409795.2	0.99	0.919	CEACAM16	MODEL	conserved
Baboon	Papio anubis	OWM	CEACAM16	2019-05-28	Panu_3.0	GCF_000264685.3	0.94	0.9137	CEACAM16	MODEL	conserved
Black-and-white colobus	Colobus angolensis palliatus	OWM	CEACAM16	2019-04-26	Cang.pa_1.0	GCF_000951035.1	0.95	0.9175	CEACAM16	MODEL	conserved
Black snub-nosed monkey	Rhinopithecus bieti	OWM	CEACAM16	2019-04-26	ASM169854v1	GCF_001698545.1	0.99	0.9125	CEACAM16	MODEL	conserved
Crab-eating macaque	Macaca fascicularis	OWM	CEACAM16	2019-05-27	Macaca_fascicularis_5.0	GCF_000364345.1	0.99	0.9148	CEACAM16	MODEL	conserved
Drill	Mandrillus leucophaeus	OWM	CEACAM16	2019-04-26	Mleu.le_1.0	GCF_000951045.1	0.99	0.9164	CEACAM16	MODEL	conserved
Golden snub-nosed monkey	Rhinopithecus roxellana	OWM	CEACAM16	2019-04-26	Rrox_v1	GCF_000769185.1	0.99	0.9118	CEACAM16	MODEL	conserved
Pig-tailed macaque	Macaca nemestrina	OWM	CEACAM16	2019-04-26	Mnem_1.0	GCF_000956065.1	0.94	0.9135	CEACAM16	MODEL	conserved
Rhesus macaque	Macaca mulatta	OWM	CEACAM16	2019-04-26	Mmul_8.0.1	GCF_000772875.2	0.99	0.9187	CEACAM16	MODEL	conserved
Rhesus macaque	Macaca mulatta	OWM	CEACAM16	2019-05-26	Mmul_10	GCF_003339765.1	NA	NA	NA	NA	NA	(See Figure 2 - source data 1C CEACAM1) single bp changes between the new and old genome assemblies, and geneious translations indicates that it is synonymous.
Sooty mangabey	Cercocebus atys	OWM	CEACAM16	2019-04-26	Caty_1.0	GCF_000955945.1	0.99	0.9169	CEACAM16	MODEL	conserved
Bolivian squirrel monkey	Saimiri boliviensis boliviensis	NWM	CEACAM16	2019-04-26	SaiBol1.0	GCF_000235385.1	0.9	0.8613	CEACAM16	MODEL	conserved
Common marmoset	Callithrix jacchus	NWM	CEACAM16	2019-04-26	Callithrix jacchus-3.2	GCF_000004665.1	0.83	0.8987	CEACAM16	MODEL	conserved
Nancy Ma's night monkey	Aotus nancymaae	NWM	CEACAM16	2019-04-26	Anan_2.0	GCA_000952055.2	0.85	0.8715	CEACAM16	MODEL	conserved
Panamanian white-faced capuchin	Cebus imitator	NWM	CEACAM16	2019-04-26	Cebus_imitator-1.0	GCA_001604975.1	0.9	0.8722	CEACAM16	MODEL	conserved
Human	Homo sapiens	Hom	CEACAM19	2019-04-22	GRCh38.p12	GCA_000001405.27	q.start(19:44671452)	q.end(19:44684355)	CEACAM19	VALIDATED	NA
Bonobo	Pan paniscus	Hom	CEACAM19	2019-04-26	panpan1.1	GCA_000258655.2	1	0.9839	CEACAM19	MODEL	conserved
Chimpanzee	Pan troglodytes	Hom	CEACAM19	2019-04-26	Clint_PTRv2	GCA_002880755.3	1	0.9831	CEACAM19	MODEL	conserved
Gorilla	Gorilla gorilla	Hom	CEACAM19	2019-04-26	gorGor4	GCA_000151905.3	1	0.9782	CEACAM19	MODEL	conserved
Sumatran orangutan	Pongo abelii	Hom	CEACAM19	2019-04-26	Susie_PABv2	GCA_002880775.3	1	0.9537	CEACAM19	MODEL	conserved
African green monkey	Chlorocebus sabaeus	OWM	CEACAM19	2019-04-26	Chlorocebus_sabeus 1.1	GCF_000409795.2	0.99	0.9237	CEACAM19	MODEL	conserved
Baboon	Papio anubis	OWM	CEACAM19	2019-04-26	Panu_3.0	GCF_000264685.3	0.99	0.9208	CEACAM19	MODEL	conserved
Black-and-white colobus	Colobus angolensis palliatus	OWM	CEACAM19	2019-04-26	Cang.pa_1.0	GCF_000951035.1	0.99	0.9164	CEACAM19	MODEL	conserved
Black snub-nosed monkey	Rhinopithecus bieti	OWM	CEACAM19	2019-04-26	ASM169854v1	GCF_001698545.1	0.99	0.905	CEACAM19	MODEL	conserved	aligns poorly to other CEACAM19 sequences with many gaps. Removed this sequence to preserve more sites for evolutionary analysis.
Crab-eating macaque	Macaca fascicularis	OWM	CEACAM19	2019-04-26	Macaca_fascicularis_5.0	GCF_000364345.1	0.99	0.9201	CEACAM19	MODEL	conserved
Drill	Mandrillus leucophaeus	OWM	CEACAM19	2019-04-26	Mleu.le_1.0	GCF_000951045.1	0.94	0.9288	CEACAM19	MODEL	conserved
Golden snub-nosed monkey	Rhinopithecus roxellana	OWM	CEACAM19	2019-04-26	Rrox_v1	GCF_000769185.1	0.99	0.9234	CEACAM19	MODEL	conserved
Pig-tailed macaque	Macaca nemestrina	OWM	CEACAM19	2019-04-26	Mnem_1.0	GCF_000956065.1	0.99	0.9179	CEACAM19	MODEL	conserved
Rhesus macaque	Macaca mulatta	OWM	CEACAM19	2019-04-26	Mmul_8.0.1	GCF_000772875.2	0.99	0.9192	CEACAM19	MODEL	conserved
Rhesus macaque	Macaca mulatta	OWM	CEACAM19	2019-05-26	Mmul_10	GCF_003339765.1	NA	NA	NA	NA	NA	(See Figure 2 - source data 1C CEACAM1) no CDS changes between old and new assemblies
Sooty mangabey	Cercocebus atys	OWM	CEACAM19	2019-04-26	Caty_1.0	GCF_000955945.1	0.99	0.9173	CEACAM19	MODEL	conserved
Bolivian squirrel monkey	Saimiri boliviensis boliviensis	NWM	CEACAM19	2019-04-26	SaiBol1.0	GCF_000235385.1	0.66	0.8956	CEACAM19	MODEL	conserved
Common marmoset	Callithrix jacchus	NWM	CEACAM19	2019-04-26	Callithrix jacchus-3.2	GCF_000004665.1	0.76	0.8604	CEACAM19	MODEL	conserved	sequence has a lot of N's, ultimately sequence had to be removed for this reason
Nancy Ma's night monkey	Aotus nancymaae	NWM	CEACAM19	2019-04-26	Anan_2.0	GCA_000952055.2	0.8	0.8552	CEACAM19	MODEL	conserved
Panamanian white-faced capuchin	Cebus imitator	NWM	CEACAM19	2019-04-26	Cebus_imitator-1.0	GCA_001604975.1	0.68	0.899	CEACAM19	MODEL	conserved	sequence has a lot of N's, ultimately sequence had to be removed for this reason
Human	Homo sapiens	Hom	CEACAM20	2019-04-22	GRCh38.p12	GCA_000001405.27	q.start(19:44530101)	q.end(19:44501309)	CEACAM20	VALIDATED	NA
Bonobo	Pan paniscus	Hom	CEACAM20	2019-04-27	panpan1.1	GCA_000258655.2	0.98	0.9791	CEACAM20	MODEL	conserved
Chimpanzee	Pan troglodytes	Hom	CEACAM20	2019-04-27	Clint_PTRv2	GCA_002880755.3	0.74	0.9723	CEACAM20	MODEL	conserved	Annotation complete, but the blast hit has a large gap in the middle of it.
Gorilla	Gorilla gorilla	Hom	CEACAM20	2019-04-27	gorGor4	GCA_000151905.3	1	0.9804	CEACAM20	MODEL	conserved
Sumatran orangutan	Pongo abelii	Hom	CEACAM20	2019-04-27	Susie_PABv2	GCA_002880775.3	0.98	0.9565	CEACAM20	MODEL	conserved
African green monkey	Chlorocebus sabaeus	OWM	CEACAM20	2019-04-29	Chlorocebus_sabeus 1.1	GCF_000409795.2	0.97	0.9291	CEACAM20	MODEL	conserved	blast hit extends outside of the annotation region, so downloaded both the annotation and the extended region.
Baboon	Papio anubis	OWM	CEACAM20	2019-04-29	Panu_3.0	GCF_000264685.3	0.72	0.9067	CEACAM20	MODEL	conserved	blast hit extends outside of the annotation region, so downloaded both the annotation and the extended region.; Updated 3/30/2021: ultimately was unable to use either genomic region for analysis - combined the two baboon results likely represent the complete CEACAM20 baboon seq, but because they do not form a contiguous sequence they were discarded
Baboon	Papio anubis	OWM	CEACAM20	2019-04-29	Panu_3.0	GCF_000264685.3	0.26	0.9072	LOC101000515 - CEACAM20-like	MODEL	too short to confirm, but appears similar	The full human blast sequence is split between this contig and the one above. Which together cover 98% of the human query sequence. Also blast hit extends outside of the annotation region, so downloaded both the annotation and the extended region.
Black-and-white colobus	Colobus angolensis palliatus	OWM	CEACAM20	2019-04-30	Cang.pa_1.0	GCF_000951035.1	0.97	0.9275	CEACAM20	MODEL	conserved	blast hit extends outside of the annotation region, so downloaded both the annotation and the extended region.
Black snub-nosed monkey	Rhinopithecus bieti	OWM	CEACAM20	2019-04-30	ASM169854v1	GCF_001698545.1	0.96	0.923	CEACAM20	MODEL	conserved	blast hit extends outside of the annotation region, so downloaded both the annotation and the extended region.
Golden Snub Nosed Monkey	Rhinopithecus roxellana	OWM	CEACAM20	2019-04-30	Rrox_v1	GCF_000769185.1	0.96	0.9243	CEACAM20	MODEL	conserved	blast hit extends outside of the annotation region, so downloaded both the annotation and the extended region.
Drill	Mandrillus leucophaeus	OWM	CEACAM20	2019-04-30	Mleu.le_1.0	GCF_000951045.1	0.95	0.911	CEACAM20	MODEL	conserved	blast hit extends outside of the annotation region, so downloaded both the annotation and the extended region.
Sooty mangabey	Cercocebus atys	OWM	CEACAM20	2019-04-30	Caty_1.0	GCF_000955945.1	0.96	0.9137	CEACAM20	MODEL	conserved	blast hit extends outside of the annotation region, so downloaded both the annotation and the extended region.
Pig-tailed macaque	Macaca nemestrina	OWM	CEACAM20	2019-04-30	Mnem_1.0	GCF_000956065.1	0.96	0.9194	CEACAM20	MODEL	conserved	blast hit extends outside of the annotation region, so downloaded both the annotation and the extended region.
Rhesus macaque	Macaca mulatta	OWM	CEACAM20	2019-04-30	Mmul_8.0.1	GCF_000772875.2	0.71	0.9074	CEACAM20	MODEL	conserved	blast hit extends outside of the annotation region, so downloaded both the annotation and the extended region.
Rhesus macaque	Macaca mulatta	OWM	CEACAM20	2019-04-30	Mmul_8.0.1	GCF_000772875.2	0.24	0.9162	LOC714065 - CEACAM20-like	none	cannot confirm: contig very short and contains only a single annotation.	like baboon the full human blast sequence is split between this contig and the one above. Which together cover 95% of the human query sequence. Also blast hit extends outside of the annotation region, so downloaded both the annotation and the extended region.
Rhesus macaque	Macaca mulatta	OWM	CEACAM20	2019-05-26	Mmul_10	GCF_003339765.1	NA	NA	NA	NA	NA	(See Figure 2 - source data 1C CEACAM1) some of bps within CDS are different between the old and new genome assemblies, also the new genome annotation is contained on a single chromosome level assembly and better matches the annotation prediction for human CEACAM20
Crab-eating macaque	Macaca fascicularis	OWM	CEACAM20	2019-04-30	Macaca_fascicularis_5.0	GCF_000364345.1	0.96	0.9114	CEACAM20	MODEL	conserved	blast hit extends outside of the annotation region, so downloaded both the annotation and the extended region.
Bolivian squirrel monkey	Saimiri boliviensis boliviensis	NWM	CEACAM20	2019-04-30	SaiBol1.0	GCF_000235385.1	0.82	0.8805	CEACAM20	MODEL	conserved	blast hit extends outside of the annotation region, so downloaded both the annotation and the extended region.
Common marmoset	Callithrix jacchus	NWM	CEACAM20	2019-04-30	Callithrix jacchus-3.2	GCF_000004665.1	0.7	0.8712	CEACAM20	MODEL	conserved	blast hit extends outside of the annotation region, so downloaded both the annotation and the extended region.; Updated 3/30/2021: ultimately was unable to use due to missing exon regions compared to other CEACAM20 homologs
Nancy Ma's night monkey	Aotus nancymaae	NWM	CEACAM20	2019-04-30	Anan_2.0	GCA_000952055.2	0.83	0.8766	CEACAM20	MODEL	conserved	blast hit extends outside of the annotation region, so downloaded both the annotation and the extended region.
Panamanian white-faced capuchin	Cebus imitator	NWM	CEACAM20	2019-04-30	Cebus_imitator-1.0	GCA_001604975.1	0.86	0.873	CEACAM20	MODEL	conserved	blast hit extends outside of the annotation region, so downloaded both the annotation and the extended region.

## Sheet: source data 1C
CEACAM1
On May-1-2019 the rhesus macaque assembly was updated to version Mmul_10. This version, was not blast searchable on NCBI as of 5/26/2019, but the genome version used previously (Mmul_8.0.1; GCF_000772875.2) was also not fully available and the database BLAST did search (GCF_000772875.3) did not appear to be fully assembled, as full genes were not retrieved and only contigs were hit rather than ch…
CEACAM3
There are two exons that are not annotated in hominids, but are present in every other primate except colobus which only has one of the two annotated and drill which has neither. Looking at the alignment these regions seem to be well conserved through out primates including hominids (though they have nonsense mutations), so I added them to the human annotation as well.
CEACAM4
Because the reported transcripts for human CEACAM4 vary so much at the end, including shifts in reading frame, it is very difficult to make a combined CEACAM4 exon sequence for analysis purposes as for other CEACAMs. For this reason used the transcript for CEACAM4 functional assays in Popp et al. 1999 and Tasc´on et al 2015, which was first reported by Kuroki et al 1991. The CEACAM4 sequence from…
CEACAM5
Rhesus macaque, pig-tailed macaque and gorilla sequences have large stretches of poor quality sequence (N's). Gorilla and rhesus N's go away with trimming non-CDS sequence, but the pig-tailed macaque N's are substantial and remain after CDS trimming, for this reason the pig-tailed macaque sequence was removed from evolutionary analyses.
CEACAM6
None
CEACAM7
In this region of the genome New World monkeys (NWM) have 3 CEACAM genes annotated: Night monkey has them annotated as CEACAM5, CEACAM6 and CEACAM7. Missing are CEACAM3 and CEACAM4 consistent with these genes originating after the split between NWM's and the group that gave rise to Old World monkeys and hominids.
CEACAM8
CEACAM16
The final human exon of CEACAM16 is very short (11 bp) and though almost perfectly conserved and annotated in almost all of the other primates included in this analysis, it is not apparent in marmoset or night monkey and the sequences in this region are so different I do not think they represent homologous sequences. For this reason and because of the shortness of the region the final exon was re…
CEACAM18
Looking at the alignment between black snub-nosed monkey, golden snub-nosed monkey and colobus, the putative CEACAM18 sequences, are very different from the other primate sequences (low seq ID, many gaps in otherwise conserved exons). For this reason, and because these regions where unannotated in their respective genomes they are unlikely to be homologous to the other CEACAM18 sequences, or they…
CEACAM19
Did not include marmoset and capuchin sequences in analyses since though present and largely complete they both had a large stretch of poor quality sequence (N's) that encompassed the whole of the region that would have been the equivalent of human exon6 in the alignment of all primate CEACAM19 sequences and would have required the removal of ~25 amino acids from future phylogenetic analyses. Als…
CEACAM20
Removed both baboon sequences from analyses: the smaller contig matches well to the first half or so of the human CEACAM20 annotation, but the first part of the longer baboon annotation also aligns to the first half of the human CEACAM20 sequence, though it is substantially different. This suggests that their may have been a recombination event that swapped a different CEACAM into the first half …
CEACAM21
None

## Sheet: source data 1D
CEACAM_GENE	M1a1	M2a2	2δ3	df4	p-value5	Tree length6	dN/dS7	% sites8	M71	M82	2δ	df	p-value	Tree length	dN/dS	% sites
CEACAM1	-5299.42	-5244.56	109.714	2	7.5e-25	1.48757	5.22332	3.125	-5300.08	-5244.54	111.069	2	3.81e-25	1.48727	5.12355	4.375
CEACAM3	-3484.59	-3445.21	78.7521	2	3.96e-18	0.966309	8.08437	2.55102	-3484.9	-3445.28	79.2536	2	3.09e-18	0.964214	7.87117	3.31633
CEACAM4	-1560.33	-1560.22	0.213946	2	0.449	0.515114	5.96839	0	-1560.35	-1560.21	0.265196	2	0.438	0.515229	5.85283	0.452489
CEACAM5_mafft_ds1†	-6924.17	-6891.82	64.6853	2	4.5e-15	1.46551	3.22503	1.67939	-6924.66	-6891.86	65.5971	2	2.85e-15	1.4648	3.13448	3.20611
CEACAM5_mafft_ds2†	-6459.55	-6416.01	87.0786	2	6.17e-20	2.18473	3.44424	3.34029	-6461.05	-6416.26	89.5863	2	1.76e-20	2.18313	3.35138	5.84551
CEACAM5_mafft_ds3†	-4866.87	-4833.43	66.873	2	1.51e-15	3.09615	3.60935	4.27632	-4868.01	-4833.31	69.4062	2	4.24e-16	3.09285	3.46765	7.23684
CEACAM5_mus_ds1†	-6846.12	-6814.11	64.0249	2	6.25e-15	1.44323	3.17524	1.68453	-6846.7	-6814.13	65.1302	2	3.6e-15	1.44256	3.08793	3.52221
CEACAM5_mus_ds2†	-5810.01	-5766.89	86.2451	2	9.36e-20	1.74491	3.61681	3.13152	-5811.24	-5766.93	88.6136	2	2.86e-20	1.74391	3.53188	6.05428
CEACAM5_mus_ds3†	-4093.04	-4057.05	71.9684	2	1.18e-16	2.04175	3.7381	4.29043	-4094.92	-4057.11	75.6224	2	1.9e-17	2.03941	3.63055	8.25083
CEACAM6	-3472.91	-3446.07	53.6863	2	1.1e-12	1.45599	5.67821	1.92308	-3472.98	-3446.13	53.6969	2	1.09e-12	1.45375	5.47187	3.52564
CEACAM7	-2701.99	-2686.33	31.3197	2	7.91e-08	1.73872	3.66876	1.76211	-2702.21	-2686.41	31.6108	2	6.84e-08	1.73809	3.83107	3.96476
CEACAM8	-3524.31	-3516.69	15.2307	2	0.000246	0.913052	2.46355	0.753769	-3524.42	-3516.7	15.4527	2	0.000221	0.912879	2.39757	0.753769
CEACAM16	-3269.76	-3269.76	0	2	0.5	0.623277	1	0	-3267.71	-3267.71	0.000198	2	0.5	0.619875	1	0.222717
CEACAM18	-2834.69	-2832.58	4.21337	2	0.061	0.963572	2.50952	0	-2835.54	-2832.58	5.91768	2	0.026	0.96355	2.52473	0.295858
CEACAM19	-1860.75	-1860.04	1.41489	2	0.246	0.58141	1.35016	0	-1860.77	-1860.04	1.45315	2	0.242	0.581411	1.35016	0.374532
CEACAM20	-5435.75	-5430.42	10.6583	2	0.00242	0.843592	2.76467	0	-5436.65	-5430.34	12.6105	2	0.000913	0.844112	2.74649	0.159236
		1models of evolution that do not allow for sites to be evolving under positive selection (ω > 1)
		2models of evolution that allow for sites to be evolving under positive selection (ω > 1)
		32δ = log-likelihood score between models (2*ln|(ModelA-ModelB)|)
		4df = degrees of freedom*
		5p-value based on a χ2 distribution of a log-likelihood ratio test (using 2δ) comparing PAML evolutionary models with and without positive selection*
		6tree length based on calclations for either Model 2 or Model 8
		7dN/dS of positive selection class for either Model 2 or Model 8
		8percent of sites assigned to positive selection class for Model 2 or Model 8
		†evolutionary anlyses performed using alignments performed by either MAFFT (mafft) or MUSCLE (mus) alignment programs for sequence datasets (ds) 1, 2 or 3 (see Methods)
		*as described in Bielawski, Joseph P. 2013. “Detecting the Signatures of Adaptive Evolution in Protein-Coding Genes.” Current Protocols in Molecular Biology / Edited by Frederick M. Ausubel ... [et al.] Chapter 19 (January): Unit 19.1.

## Sheet: source data 1E
CEACAM	Peptide Length*	PAML - Model 2 Bayes Empirical Bayes1	Total Sites PAML	HyPhy FUBAR2	Total Sites FUBAR	HyPhy GARD Break Points	Total Break Points	HyPhy MEME3	Total Sites MEME	HyPhy MEME without GARD4	Total Sites MEME2	All Sites 1x5	Total 1x Sites	All Sites 2x6	Total 2x Sites	All Sites 3x7	Total 3x Sites	PAML/FUBAR Overlap8	Total PAML/FUBAR	PAML/MEME Overlap9	Total PAML/MEME	FUBAR/MEME Overlap10	Total FUBAR/MEME
CEACAM1	480	27, 28, 29, 41, 44, 51, 61, 66, 67, 93, 135, 148, 216, 373, 384	15	4, 27, 28, 29, 34, 41, 44, 46, 51, 54, 61, 66, 67, 93, 114, 116, 135, 137, 148, 172, 216, 267, 284, 290, 355, 373, 384	27	306, 598	2	28, 43, 51, 66, 93, 98, 110, 148, 187, 200, 216, 284, 384	13	27, 28, 43, 44, 51, 66, 93, 98, 110, 135, 148, 187, 200, 216, 267, 284, 366, 381, 384, 397	20	4, 27, 28, 29, 34, 41, 43, 44, 46, 51, 54, 61, 66, 67, 93, 98, 110, 114, 116, 135, 137, 148, 172, 187, 200, 216, 267, 284, 290, 355, 373, 384	32	27, 28, 29, 41, 44, 51, 61, 66, 67, 93, 135, 148, 216, 284, 373, 384	16	28, 51, 66, 93, 148, 216, 384	7	27, 28, 29, 41, 44, 51, 61, 66, 67, 93, 135, 148, 216, 373, 384	15	28, 51, 66, 93, 148, 216, 384	7	28, 51, 66, 93, 148, 216, 284, 384	8
CEACAM3	392	28, 29, 43, 46, 47, 49, 53, 66, 92, 121	10	25, 28, 29, 42, 43, 44, 46, 47, 49, 53, 66, 68, 92, 112, 121, 132, 135, 137, 360, 388	20	362, 735	2	28, 29, 92, 121, 135	5	28, 29, 43, 47, 66, 92, 121, 135	8	25, 28, 29, 42, 43, 44, 46, 47, 49, 53, 66, 68, 92, 112, 121, 132, 135, 137, 360, 388	20	28, 29, 43, 46, 47, 49, 53, 66, 92, 121, 135	11	28, 29, 92, 121	4	28, 29, 43, 46, 47, 49, 53, 66, 92, 121	10	28, 29, 92, 121	4	28, 29, 92, 121, 135	5
CEACAM4	221	None	0	32, 212	2	None	0	167	1	None	0	32, 167, 212	3	None	0	None	0	None	0	None	0	None	0
CEACAM5_mafft_ds1†	655	28, 37, 45, 48, 149, 175, 187, 384, 412, 494, 589	11	21, 27, 28, 31, 42, 45, 46, 48, 49, 58, 111, 149, 158, 174, 175, 211, 228, 335, 350, 352, 360, 412, 461, 463, 484, 485, 494, 522, 532, 562, 584, 589, 599	33	283, 445, 592, 842	4	38, 49, 57, 90, 145, 175, 370, 394, 412, 484, 494, 522, 532, 589, 612	15	28, 31, 38, 48, 49, 57, 95, 120, 164, 175, 197, 242, 370, 394, 412, 451, 484, 494, 532, 589, 612	21	21, 27, 28, 31, 37, 38, 42, 45, 46, 48, 49, 57, 58, 90, 111, 145, 149, 158, 174, 175, 187, 211, 228, 335, 350, 352, 360, 370, 384, 394, 412, 461, 463, 484, 485, 494, 522, 532, 562, 584, 589, 599, 612	43	28, 45, 48, 49, 149, 175, 412, 484, 494, 522, 532, 589	12	175, 412, 494, 589	4	28, 45, 48, 149, 175, 412, 494, 589	8	175, 412, 494, 589	4	49, 175, 412, 484, 494, 522, 532, 589	8
CEACAM5_mafft_ds2†	479	28, 37, 42, 45, 48, 149, 175, 238, 352, 360, 383, 384, 386, 412, 436, 451	16	21, 28, 31, 41, 42, 45, 46, 48, 49, 52, 58, 105, 111, 158, 175, 211, 228, 311, 322, 329, 352, 357, 360, 370, 381, 386, 416, 438, 451	29	266, 434, 592, 746	4	28, 38, 42, 49, 57, 95, 145, 175, 211, 228, 322, 370, 386, 394, 412, 418, 458	17	28, 31, 38, 39, 42, 48, 49, 57, 91, 95, 105, 120, 145, 164, 175, 197, 228, 242, 322, 352, 370, 416, 419, 438, 446, 451, 458	27	21, 28, 31, 37, 38, 41, 42, 45, 46, 48, 49, 52, 57, 58, 95, 105, 111, 145, 149, 158, 175, 211, 228, 238, 311, 322, 329, 352, 357, 360, 370, 381, 383, 384, 386, 394, 412, 416, 418, 436, 438, 451, 458	43	28, 42, 45, 48, 49, 175, 211, 228, 322, 352, 360, 370, 386, 412, 451	15	28, 42, 175, 386	4	28, 42, 45, 48, 175, 352, 360, 386, 451	9	28, 42, 175, 386, 412	5	28, 42, 49, 175, 211, 228, 322, 370, 386	9
CEACAM5_mafft_ds3†	304	28, 45, 48, 49, 90, 149, 175, 228, 238, 260, 262, 264, 284	13	21, 25, 28, 31, 41, 42, 45, 46, 48, 49, 54, 58, 65, 87, 105, 111, 149, 155, 158, 175, 197, 211, 234, 241, 242, 262, 264, 288	28	301, 491	2	31, 38, 42, 48, 49, 57, 90, 95, 145, 165, 175, 191, 194, 197, 211, 238, 241	17	21, 28, 31, 38, 39, 41, 42, 48, 49, 50, 52, 54, 57, 91, 95, 105, 145, 164, 175, 191, 197, 211, 238, 241, 298	25	21, 25, 28, 31, 38, 41, 42, 45, 46, 48, 49, 54, 57, 58, 65, 87, 90, 95, 105, 111, 145, 149, 155, 158, 165, 175, 191, 194, 197, 211, 228, 234, 238, 241, 242, 260, 262, 264, 284, 288	40	28, 31, 42, 45, 48, 49, 90, 149, 175, 197, 211, 238, 241, 262, 264	15	48, 49, 175	3	28, 45, 48, 49, 149, 175, 262, 264	8	48, 49, 90, 175, 238	5	31, 42, 48, 49, 175, 197, 211, 241	8
CEACAM5_mus_ds1†	653	28, 44, 45, 47, 147, 173, 185, 382, 410, 493, 587	11	21, 27, 28, 31, 41, 44, 45, 47, 48, 109, 147, 156, 172, 173, 209, 226, 239, 333, 348, 350, 358, 410, 460, 462, 483, 484, 493, 521, 531, 536, 561, 582, 587, 597	34	326, 435, 522, 702, 836	5	48, 88, 93, 173, 195, 368, 392, 410, 483, 493, 521, 531, 587, 589, 610	15	28, 31, 47, 48, 93, 118, 162, 173, 195, 240, 368, 392, 410, 449, 483, 493, 531, 587, 610	19	21, 27, 28, 31, 41, 44, 45, 47, 48, 88, 93, 109, 147, 156, 172, 173, 185, 195, 209, 226, 239, 333, 348, 350, 358, 368, 382, 392, 410, 460, 462, 483, 484, 493, 521, 531, 536, 561, 582, 587, 589, 597, 610	43	28, 44, 45, 47, 48, 147, 173, 410, 483, 493, 521, 531, 587	13	173, 410, 493, 587	4	28, 44, 45, 47, 147, 173, 410, 493, 587	9	173, 410, 493, 587	4	48, 173, 410, 483, 493, 521, 531, 587	8
CEACAM5_mus_ds2†	479	28, 41, 44, 47, 48, 147, 173, 185, 236, 309, 319, 371, 387, 413, 414	15	21, 27, 28, 31, 40, 41, 44, 45, 47, 48, 51, 53, 56, 103, 109, 147, 156, 173, 189, 209, 226, 236, 286, 288, 309, 310, 319, 347, 349, 357, 362, 371, 387, 408, 413, 414, 423, 467, 479	39	266, 439, 552	3	28, 41, 48, 88, 89, 143, 173, 195, 236, 295, 309, 319, 357, 371, 387, 413, 415, 436	18	28, 31, 41, 47, 48, 89, 93, 103, 118, 162, 173, 195, 236, 295, 309, 319, 357, 371, 387, 413, 415, 436	22	21, 27, 28, 31, 40, 41, 44, 45, 47, 48, 51, 53, 56, 88, 89, 103, 109, 143, 147, 156, 173, 185, 189, 195, 209, 226, 236, 286, 288, 295, 309, 310, 319, 347, 349, 357, 362, 371, 387, 408, 413, 414, 415, 423, 436, 467, 479	47	28, 41, 44, 47, 48, 147, 173, 236, 309, 319, 357, 371, 387, 413, 414	15	28, 41, 48, 173, 236, 309, 319, 371, 387, 413	10	28, 41, 44, 47, 48, 147, 173, 236, 309, 319, 371, 387, 413, 414	14	28, 41, 48, 173, 236, 309, 319, 371, 387, 413	10	28, 41, 48, 173, 236, 309, 319, 357, 371, 387, 413	11
CEACAM5_mus_ds3†	303	28, 39, 41, 44, 47, 48, 88, 103, 116, 143, 195, 211, 237	13	7, 21, 25, 28, 31, 40, 41, 44, 45, 47, 48, 53, 56, 63, 85, 88, 103, 109, 111, 143, 171, 181, 195, 211, 228, 237, 238, 247, 284, 291, 294	31	295, 524	2	41, 47, 48, 88, 93, 103, 118, 143, 181, 211, 237, 239, 260	13	31, 41, 47, 48, 49, 93, 103, 118, 143, 181, 211, 239, 260	13	7, 21, 25, 28, 31, 39, 40, 41, 44, 45, 47, 48, 53, 56, 63, 85, 88, 93, 103, 109, 111, 116, 118, 143, 171, 181, 195, 211, 228, 237, 238, 239, 247, 260, 284, 291, 294	37	28, 41, 44, 47, 48, 88, 103, 143, 181, 195, 211, 237	12	41, 47, 48, 88, 103, 143, 211, 237	8	28, 41, 44, 47, 48, 88, 103, 143, 195, 211, 237	11	41, 47, 48, 88, 103, 143, 211, 237	8	41, 47, 48, 88, 103, 143, 181, 211, 237	9
CEACAM6	312	28, 29, 51, 93, 114, 148	6	28, 32, 41, 43, 44, 51, 53, 67, 93, 103, 105, 114, 139, 148, 200, 232, 311	17	456	1	28, 41, 43, 51, 93, 96, 98, 148, 279, 289	10	28, 41, 43, 51, 53, 93, 96, 98, 148, 289	10	28, 29, 32, 41, 43, 44, 51, 53, 67, 93, 96, 98, 103, 105, 114, 139, 148, 200, 232, 279, 289, 311	22	28, 41, 43, 51, 93, 114, 148	7	28, 51, 93, 148	4	28, 51, 93, 114, 148	5	28, 51, 93, 148	4	28, 41, 43, 51, 93, 148	6
CEACAM7	227	50, 52, 97, 161	4	24, 50, 52, 55, 79, 89, 93, 161, 186	9	306	1	7, 41, 52, 69, 93, 96, 107, 161, 171, 198	10	7, 41, 49, 52, 96, 107, 161, 186, 198	9	7, 24, 41, 50, 52, 55, 69, 79, 89, 93, 96, 97, 107, 161, 171, 186, 198	17	50, 52, 93, 161	4	52, 161	2	50, 52, 161	3	52, 161	2	52, 93, 161	3
CEACAM8	398	38, 43, 292	3	28, 43, 51, 52, 57, 63, 159, 174, 272, 285, 292, 306, 328, 359	14	None	0	108, 292, 373	3	None	0	28, 38, 43, 51, 52, 57, 63, 108, 159, 174, 272, 285, 292, 306, 328, 359, 373	17	43, 292	2	292	1	43, 292	2	292	1	292	1
CEACAM16	449	None	0	258	1	None	0	424	1	None	0	258, 424	2	None	0	None	0	None	0	None	0	None	0
CEACAM18	338	None	0	167, 187	2	None	0	187, 283, 295	3	None	0	167, 187, 283, 295	4	187	1	None	0	None	0	None	0	187	1
CEACAM19	267	None	0	240	1	None	0	None	0	None	0	240	1	None	0	None	0	None	0	None	0	None	0
CEACAM20	628	None	0	28, 120, 262, 358, 553, 602	6	None	0	2, 23, 195, 268, 551	5	None	0	2, 23, 28, 120, 195, 262, 268, 358, 551, 553, 602	11	None	0	None	0	None	0	None	0	None	0
		*length of peptide after trimming for all sites common between set of primate proteins
		1sites identified by PAML Model 2 Bayes Empirical Bayes analysis as evolving under positive selection with posterior probability >95%
		2Identification of sites evolving under positive selection by HyPhy - FUBAR analysis using primate species tree
		3Identification of sites evolving under positive selection by HyPhy - MEME analysis using trees based on GARD break points
		4Identification of sites evolving under positive selection by HyPhy - MEME analysis using the primate species tree
		5all sites found to be evolving under positive selection by at least one test
		6all sites found to be evolving under positive selection by at least two tests
		7all sites found to be evolving under positive selection by three tests (PAML, FUBAR and MEME using GARD trees)
		8sites found by both PAML and FUBAR tests
		9sites found by both PAML and MEME using GARD trees
		10sites found by both FUBAR and MEME using GARD trees
		†evolutionary anlyses performed using alignments performed by either MAFFT (mafft) or MUSCLE (mus) alignment programs for sequence datasets (ds) 1, 2 or 3 (see Methods)

## Sheet: source data 1F
Citation	CEACAM1 sites as involved in host protein or adhesin binding
Adrian, Jonas, Patrizia Bonsignore, Sebastian Hammer, Tancred Frickey, and Christof R. Hauck. 2019. “Adaptation to Host-Specific Bacterial Pathogens Drives Rapid Evolution of a Human Innate Immune Receptor.” Current Biology: CB 29 (4): 616–30.e5.	Q27, L28, F29, R43, Q44, A49
Fedarovich, Alena, Joshua Tomberg, Robert A. Nicholas, and Christopher Davies. 2006. “Structure of the N-Terminal Domain of Human CEACAM1: Binding Target of the Opacity Proteins during Invasion of Neisseria Meningitidis and N. Gonorrhoeae.” Acta Crystallographica. Section D, Biological Crystallography 62 (9): 971–79.	Q27, L28, F29, S32, Y34, V39, D40, G41, R43, Q44, Q89, I91
Korotkova, Natalia, Yi Yang, Isolde Le Trong, Ernesto Cota, Borries Demeler, Jan Marchant, Wendy E. Thomas, Ronald E. Stenkamp, Steve L. Moseley, and Steve Matthews. 2008. “Binding of Dr Adhesins of Escherichia Coli to Carcinoembryonic Antigen Triggers Receptor Dissociation.” Molecular Microbiology 67 (2): 420–34.	Q27, L28, F29, I91, L95
Martin, Jennifer N., Louise M. Ball, Tsega L. Solomon, Alison H. Dewald, K. Alison, Linda Columbus, and Cancer Biology. 2016. “Neisserial Opa Protein – CEACAM Interactions: Competition for Receptors as a Means for Bacterial Invasion and Pathogenesis.” Biochemistry 55 (31): 4286–94.	Q27, L28, F29, S32, Y34, V39, G41, Q44, Q89, I91
Popp, Andreas, Christoph Dehio, Fritz Grunert, Thomas F. Meyer, and Scott D. Gray-Owen. 1999. “Molecular Analysis of Neisserial Opa Protein Interactions with the CEA Family of Receptors: Identification of Determinants Contributing to the Differential Specificities of Binding.” Cellular Microbiology 1 (2): 169–81.	Q27, L28, F29, S32
Brewer, Matthew L., David Dymock, R. Leo Brady, Bernhard B. Singer, Mumtaz Virji, and Darryl J. Hill. 2019. “Fusobacterium Spp. Target Human CEACAM1 via the Trimeric Autotransporter Adhesin CbpF.” Journal of Oral Microbiology 11 (1): 1–16.	F29, Y34, Q44, G47, Q89, I91, L95, V96
Moonens, Kristof, Youssef Hamway, Matthias Neddermann, Marc Reschke, Nicole Tegtmeyer, Tobias Kruse, Robert Kammerer, et al. 2018. “Helicobacter Pylori Adhesin HopQ Disrupts Trans Dimerization in Human CEACAMs.” The EMBO Journal 37 (13): e98665.	F29, S32, G41, Q44, A49, G51, I91, L95, V96
Bonsor, Daniel A., Qing Zhao, Barbara Schmidinger, Evelyn Weiss, Jingheng Wang, Daniel Deredge, Robert Beadenkopf, et al. 2018. “The Helicobacter Pylori Adhesin Protein HopQ Exploits the Dimer Interface of Human CEACAMs to Facilitate Translocation of the Oncoprotein CagA.” The EMBO Journal 37: e98664.	F29, G41, N42, Q44, T56, P59, Q89, D94, L95, N97
Sorge, Nina M. van, Daniel A. Bonsor, Liwen Deng, Erik Lindahl, Verena Schmitt, Mykola Lyndin, Alexej Schmidt, et al. 2021. “Bacterial Protein Domains with a Novel Ig‐like Fold Target Human CEACAM Receptors.” The EMBO Journal, February, e106103.	F29, G30, Y31, S32, Y34, D40, G41, Q44, A49, T56, I91, S93, D94, L95, V96
Markel, G., R. Gruda, H. Achdout, G. Katz, M. Nechama, R. S. Blumberg, R. Kammerer, W. Zimmermann, and O. Mandelboim. 2004. “The Critical Role of Residues 43R and 44Q of Carcinoembryonic Antigen Cell Adhesion Molecules-1 in the Protection from Killing by Human NK Cells.” The Journal of Immunology 173 (6): 3732–39.	G30, Y31, S32, W33, Y34, K35, V39, D40, N42, R43, Q44, I45, V46, R64, Q80, N81, D82, T83, G84
Virji, Mumtaz, Debbie Evans, Andrea Hadfield, Fritz Grunert, Ana M. Telxeira, and Suzanne M. Watt. 1999. “Critical Determinants of Host Receptor Targeting by Neisseria Meningitidis and Neisseria Gonorrhoeae: Identification of Opa Adhesiotopes on the N-Domain of CD66 Molecules.” Molecular Microbiology 34 (3): 538–51.	S32, Y34, V39, Q44, Q89, I91
Conners, Rebecca, Darryl J. Hill, Elena Borodina, Christopher Agnew, Sarah J. Daniell, Nicholas M. Burton, Richard B. Sessions, et al. 2008. “The Moraxella Adhesin UspA1 Binds to Its Human CEACAM1 Receptor by a Deformable Trimeric Coiled-Coil.” The EMBO Journal 27 (12): 1779–89.	Y34, Q44, G47, I91
Villullas, Silvia, Darryl J. Hill, Richard B. Sessions, Jon Rea, and Mumtaz Virji. 2007. “Mutational Analysis of Human CEACAM1: The Potential of Receptor Polymorphism in Increasing Host Susceptibility to Bacterial Infection.” Cellular Microbiology 9 (2): 329–46.	Y34, Q89, I91
Huang, Yu Hwa, Chen Zhu, Yasuyuki Kondo, Ana C. Anderson, Amit Gandhi, Andrew Russell, Stephanie K. Dougan, et al. 2015. “CEACAM1 Regulates TIM-3-Mediated Tolerance and Exhaustion.” Nature 517 (7534): 386–90.	N42, R43, Q44, G47, Q89
