# Supplementary material for: Evolution of host-microbe cell adherence by receptor domain shuffling
Source: eLife. 2022 Jan 25;11:e73330. doi: 10.7554/eLife.73330 (PMC8860441; doi:10.7554/eLife.73330)
Supplement: Supplementary file 1. — Table of oligomers, DNA templates, and their order in assembly reactions used to assemble carcinoembryonic antigen-associated cell adhesion molecule 1 (CEACAM1) N-domain expression plasmids. B. Sources templates for plasmid components. Table listing sources of template sequences for CEACAM1 and other plasmid components used for expression plasmid construction. [file elife-73330-supp1.xlsx]

## Sheet: Supplementary file 1A
*Note: Underlined portion denotes tag for LIC cloning into pcDNA3 GFP LIC vector (6D)
Human CEACAM1	Assembly Reaction	Primers	Template
	Reaction 1	IgK pCDNA GFP LIC F:	Human IgK-chain leader sequence
		5’-TACTTCCAATCCAATGCCACCATGGAGACAGACACACTCCTG-3’
		IgK CEACAM1N R1: 5’-CATGGATTCAGTAGTGAGCTG GTCACCAGTGGAACC-3’
	Reaction 2	IgK CEACAM1N F2: 5’-GGTTCCAGGTTCCACTGGTGACCAGCTCACTACTGAATCC-3’	Human CEACAM1
		STREP II CECAM1N R2:
		5'-TTCGAACTGCGGGTGGCTCCAGTATACATGGAACTGTCCAG-3’
	Reaction 3	STREP II CEACAM1N F3:	STREPII/TEV
		5’CTGGACAGTTCCATGTATACCCTTTTTCGAACTGCGGGTGGCTCCAGTATACATGGAACTGTCCAGTTG-3’
		GFP STREP II CEACAM1N R3: 5’CTCCCACTACCAATGCCGGATTGGAAGTACAGGTTTTCGG 3’
	Reaction 4	IgK pCDNA GFP LIC F	Combine Products of Reactions 1-3
		GFP STREP II CEACAM1N R3
Bonobo CEACAM1	Reaction 1	IgK pCDNA GFP LIC F	Human IgK-chain leader sequence
		IgK CEACAM1N Bonobo R1: 5’-CGTGGATTCAATGGTGAGCTT GTCACCAGTGGAACC-3’
	Reaction 2	IgK CEACAM1N Bonobo F2:	Bonobo CEACAM1
		5’-GGTTCCAGGTTCCACTGGTGACAAGCTCACCATTGAATCCACG-3’
		IgK CEACAM1N Bonobo R2:
		5’-CCTTTTTCGAACTGCGGGTGGCTCCAGTATACATGGAACTGTCCA-3’
	Reaction 3	STREPII CEACAM1N Bonobo F3:	STREPII/TEV
		5’-TGGACAGTTCCATGTATACTGGAGCCACCCGCAGTTCGAAAAAGG-3’
		GFP STREP II CEACAM1N R3
	Reaction 4	IgK pCDNA GFP LIC F	Combine Products of Reactions 1-3
		GFP STREP II CEACAM1N R3
Chimpanzee CEACAM1	Reaction 1	IgK pCDNA GFP LIC F	Human IgK-chain leader sequence
		IgK CEACAM1N Chimp R1: 5’-CATGGATTCAGTAGTGAGCTG GTCACCAGTGGAACC-3’
	Reaction 2	IgK CEACAM1N Chimp F2:	Bonobo CEACAM1
		5’-GGTTCCAGGTTCCACTGGTGAC CAGCTCACTACTGAATCCATG-3’
		IgK CEACAM1N Chimp R2:
		5’-CCTTTTTCGAACTGCGGGTGGCTCCA GTATACATGGAACTGTCCA-3’
	Reaction 3	IgK CEACAM1N Chimp F3:	STREPII/TEV
		5’-TGGACAGTTCCATGTATAC TGGAGCCACCCGCAGTTCGAAAAAGG-3’
		GFP STREP II CEACAM1N R3
	Reaction 4	IgK pCDNA GFP LIC F	Combine Products of Reactions 1-3
		GFP STREP II CEACAM1N R3
Gorilla CEACAM1	Reaction 1	IgK pCDNA GFP LIC F	Human IgK-chain leader sequence
		IgK CEACAM1N Gorilla R1: 5’-GGCATGGATTCAGTAGTGAGCTG GTCACCAGTGGAACC-3’
	Reaction 2	IgK CEACAM1N Gorilla F2:	Bonobo CEACAM1
		5’-GGTTCCAGGTTCCACTGGTGAC CAGCTCACTACTGAATCCATGCC-3’
		IgK CEACAM1N Gorilla R2:
		5’-CCTTTTTCGAACTGCGGGTGGCTCCA GTATACATGGAACTGTCC-3’
	Reaction 3	STREPII CEACAM1N Gorilla F3:	STREPII/TEV
		5’-GGACAGTTCCATGTATAC TGGAGCCACCCGCAGTTCGAAAAAGG-3’
		GFP STREP II CEACAM1N R3
	Reaction 4	IgK pCDNA GFP LIC F	Combine Products of Reactions 1-3
		GFP STREP II CEACAM1N R3
Orangutan CEACAM1	Reaction 1	IgK pCDNA GFP LIC F	Human IgK-chain leader sequence
		IgK CEACAM1N ORA R1: 5’-CAGCTCACTACTGAATCCACG GTCACCAGTGGAACC-3’
	Reaction 2	IgK CEACAM1N ORA F2:	Bonobo CEACAM1
		5’-GGTTCCAGGTTCCACTGGTGAC CAGCTCACTACTGAATCCACG-3’
		IgK CEACAM1N ORA R2:
		5’-CCTTTTTCGAACTGCGGGTGGCTCCA GTATACATGGAACTGTCCA-3’
	Reaction 3	IgK CEACAM1N ORA F3:	STREPII/TEV
		5’-TGGACAGTTCCATGTATAC TGGAGCCACCCGCAGTTCGAAAAAGG-3’
		GFP STREP II CEACAM1N R3
	Reaction 4	IgK pCDNA GFP LIC F	Combine Products of Reactions 1-3
		GFP STREP II CEACAM1N R3
Baboon CEACAM1	Reaction 1	IgK pCDNA GFP LIC F	Human IgK-chain leader sequence
		IgK CEACAM1N Baboon R1:
		5’-CCTGGATTCAATAGTGAGCTG GTCACCAGTGGAACC-3’
	Reaction 2	IgK CEACAM1N Baboon F2:	Bonobo CEACAM1
		5’-GGTTCCAGGTTCCACTGGTGAC CAGCTCACTATTGAATCCAGG-3’
		IgK CEACAM1N Baboon R2:
		5’-CCTTTTTCGAACTGCGGGTGGCTCCA ATATACCCGGAACTGGCCA-3’
	Reaction 3	IgK CEACAM1N Baboon F3:	STREPII/TEV
		5’-TGGCCAGTTCCGGGTATAT TGGAGCCACCCGCAGTTCGAAAAAGG-3’
		GFP STREP II CEACAM1N R3
	Reaction 4	IgK pCDNA GFP LIC F	Combine Products of Reactions 1-3
		GFP STREP II CEACAM1N R3
Squirrel Monkey CEACAM1	Reaction 1	IgK pCDNA GFP LIC F	Human IgK-chain leader sequence
		IgK CEACAM1N SquirrelM R1:
		5’-CACGGATTCAATAGTGAGCTG GTCACCAGTGGAACC-3’
	Reaction 2	IgK CEACAM1N SquirrelM F2:	Bonobo CEACAM1
		5’-GGTTCCAGGTTCCACTGGTGAC CAGCTCACTATTGAATCCGTG-3’
		IgK CEACAM1N SquirrelM R2:
		5’-CCTTTTTCGAACTGCGGGTGGCTCCA GTATACACGGAACTGGCCT-3’
	Reaction 3	IgK CEACAM1N SquirrelM F3:	STREPII/TEV
		5’-AGGCCAGTTCCGTGTATAC TGGAGCCACCCGCAGTTCGAAAAAGG-3’
		GFP STREP II CEACAM1N R3
	Reaction 4	IgK pCDNA GFP LIC F	Combine Products of Reactions 1-3
		GFP STREP II CEACAM1N R3

## Sheet: Supplementary file 1B
Genomic and Template Sources
Template Name	Template Source	Template Sequence
Human CEACAM1	Synthesized Commercially (Genscript, USA) and cloned at HindIII/XhoI in the pCDNA3.1(+) vector	Homo sapiens CEACAM1 GenBank Sequence ID: NM_001712.5
Bonobo CEACAM1	Synthesized Commercially (Genscript, USA) and cloned at HindIII/XhoI in the pCDNA3.1(+) vector	Pan paniscus CEACAM1 GenBank Sequence ID: XM_008964144.2
Chimpanzee CEACAM1	Synthesized Commercially (Genscript, USA) and cloned at HindIII/XhoI in the pCDNA3.1(+) vector	Pan troglodytes CEACAM1 GenBank Sequence ID: XM_016934255.2
Gorilla CEACAM1	Synthesized Commercially (Genscript, USA) and cloned at HindIII/XhoI in the pCDNA3.1(+) vector	Gorilla gorilla (western lowland gorilla) CEACAM1 GenBank Sequence ID: XM_031004080.1
Orangutan CEACAM1	Synthesized Commercially (Genscript, USA) and cloned at HindIII/XhoI in the pCDNA3.1(+) vector	Pongo abelii (Sumatran orangutan) Genbank Sequence ID: XM_024236309.1
Baboon CEACAM1	Synthesized Commercially (Genscript, USA) and cloned at HindIII/XhoI in the pCDNA3.1(+) vector	Papio anubis CEACAM1 GenBank Sequence ID: XM_003915629.4
Squirrel Monkey CEACAM1	Synthesized Commercially (Genscript, USA) and cloned at HindIII/XhoI in the pCDNA3.1(+) vector	Saimiri boliviensis boliviensis CEACAM1 GenBank Sequence ID: XM_003943210.3
Human IgƘ-chain leader sequence	Synthesized Commercially (Integrated DNA Technologies, USA)	5’-ATGGAGACAGACACACTCCTGCTATGGGTACTGCTGCTCTGGGTTCCAGGTTCCACTGGTGAC -3’
STREPII/TEV	Synthesized Commercially (Integrated DNA Technologies, USA)	5’-TGGAGCCACCCGCAGTTCGAAAAAGGCGCCGAAAACCTGTACTTCCAATCC-3’
IgƘ STREPII/TEV for GFP	Synthesized Commercially (Integrated DNA Technologies, USA)	5’-TACTTCCAATCCAATGCCACC ATGGAGACAGACACACTCCTG CTATGGGTACTGCTGCTCTGGGTTCCAGGTTCCACTGGTGACTGGAGCCACCCGCAGTTCGAAAAAGGCGCCGAAAACCTGTACTTCCAATCCGGCATTGGTAGTGGGAG-3’
